# Supplementary material
Source: bioRxiv or medRxiv preprint supplement (https://medrxiv.org/highwire/filestream/85332/field_highwire_adjunct_files/0/2020.06.09.20126862-1.pdf)
Supplement: Supplementary file [file 2020.06.09.20126862-1.pdf]

# Supplementary Data for Bayesian investigation of SARS-CoV-2-related mortality in France

Louis Duchemin, Philippe Veber, Bastien Boussau

June 9, 2020

## Contents

|          |                                                          |           |
|----------|----------------------------------------------------------|-----------|
| <b>1</b> | <b>Region-wise estimates</b>                             | <b>2</b>  |
| <b>2</b> | <b>Region-wise simulations for week-ends effect size</b> | <b>15</b> |
| <b>3</b> | <b>Region-wise simulations for elections effect size</b> | <b>22</b> |

# 1 Region-wise estimates

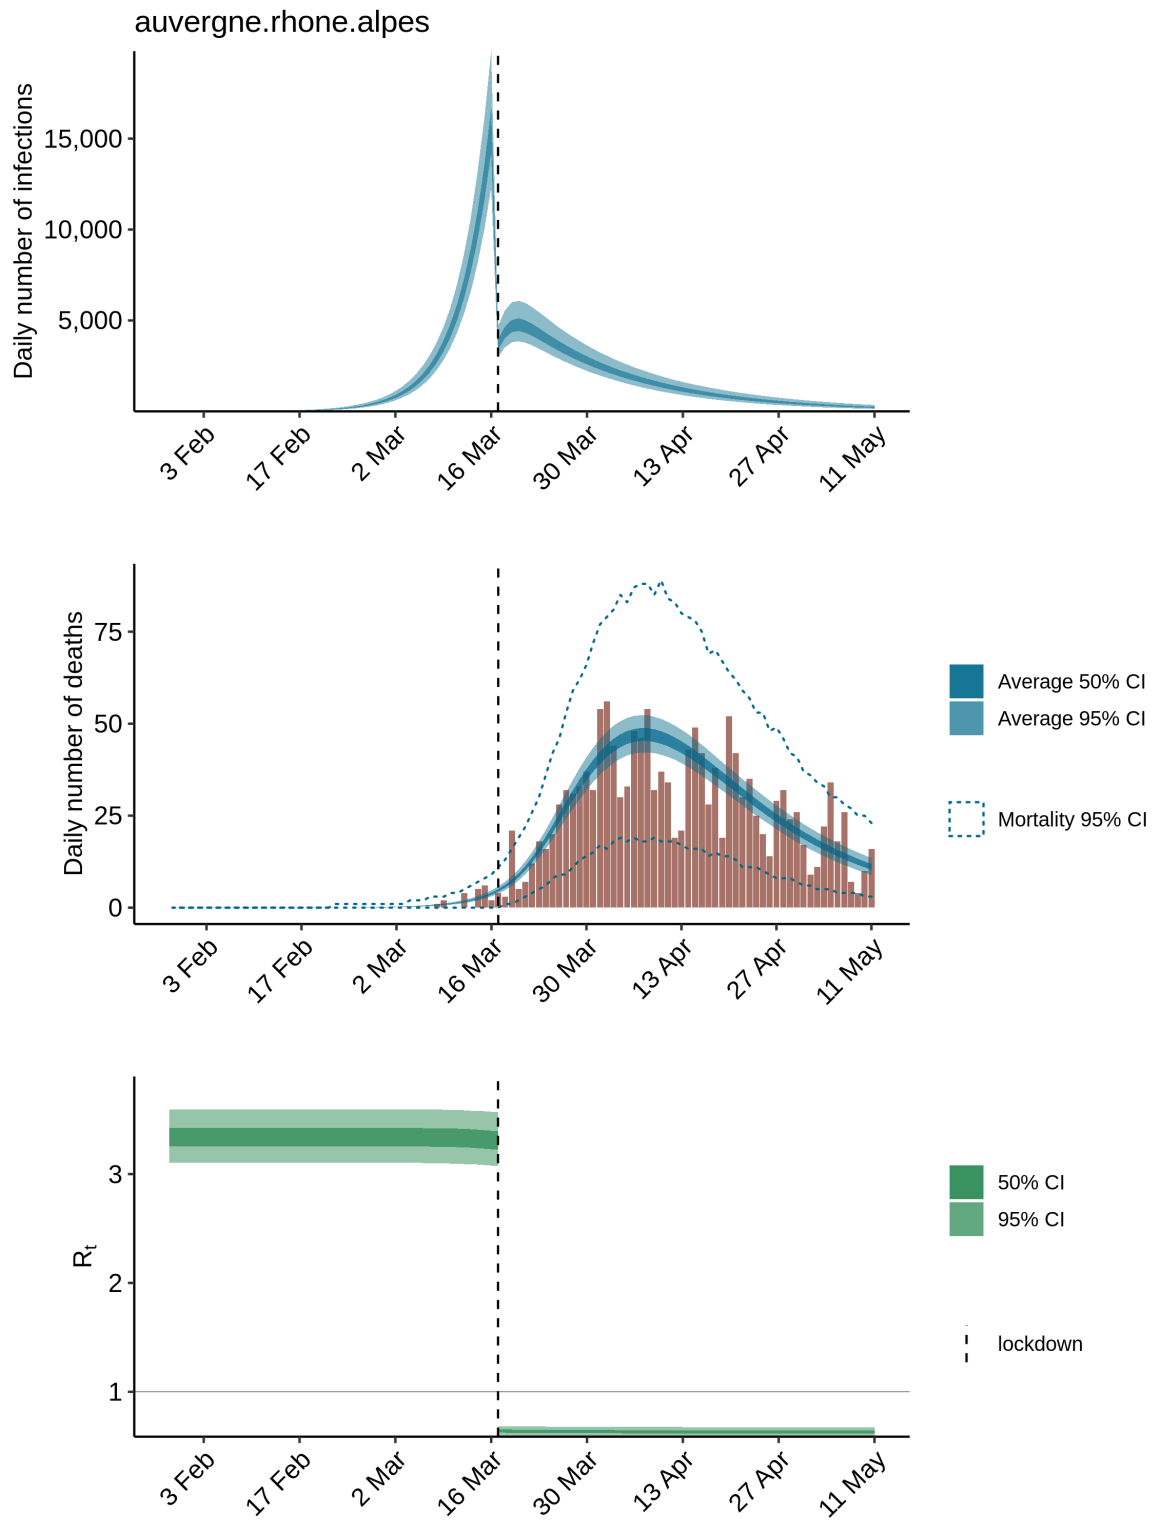

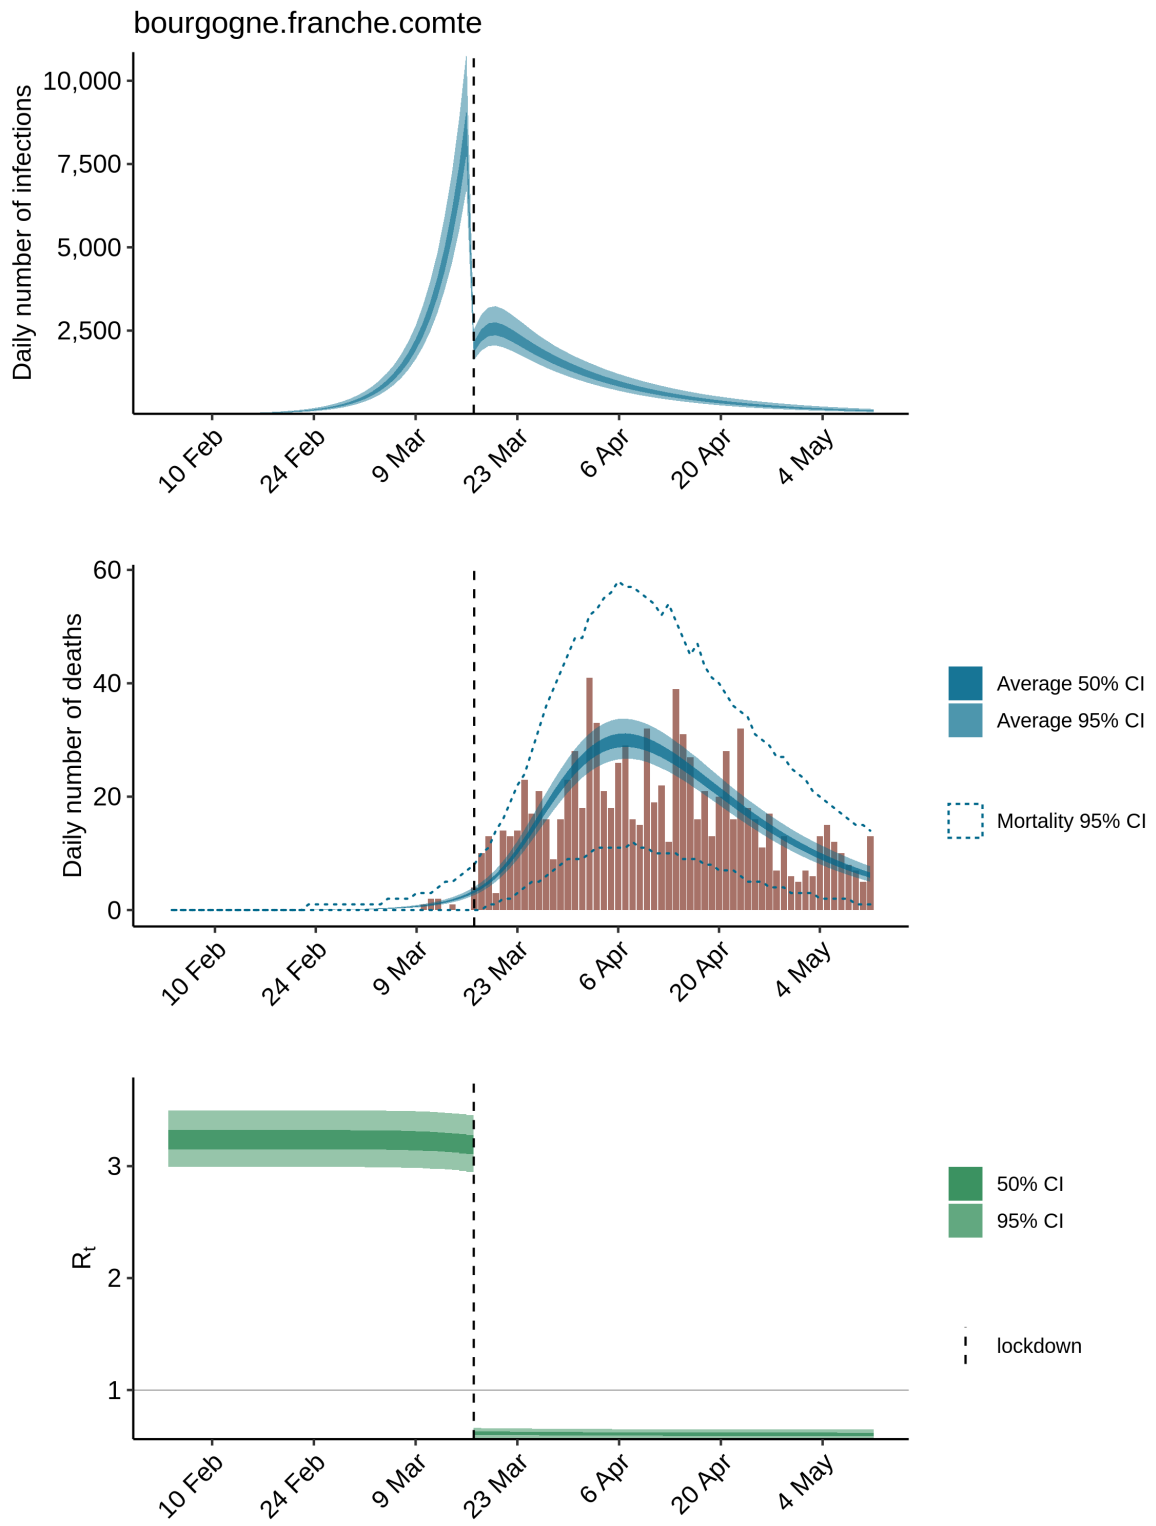

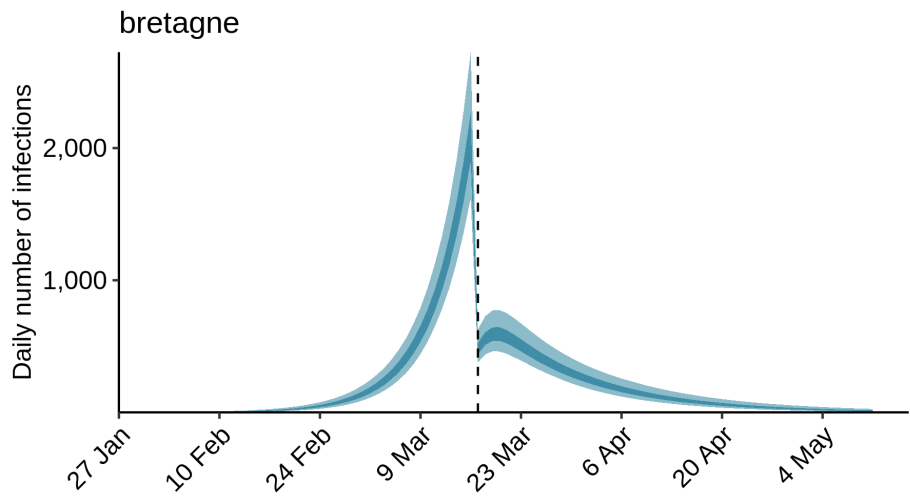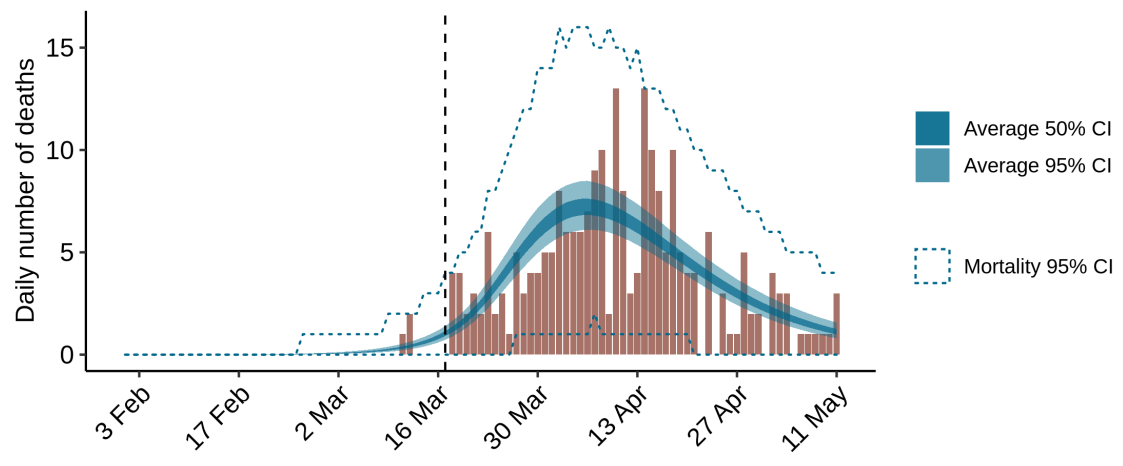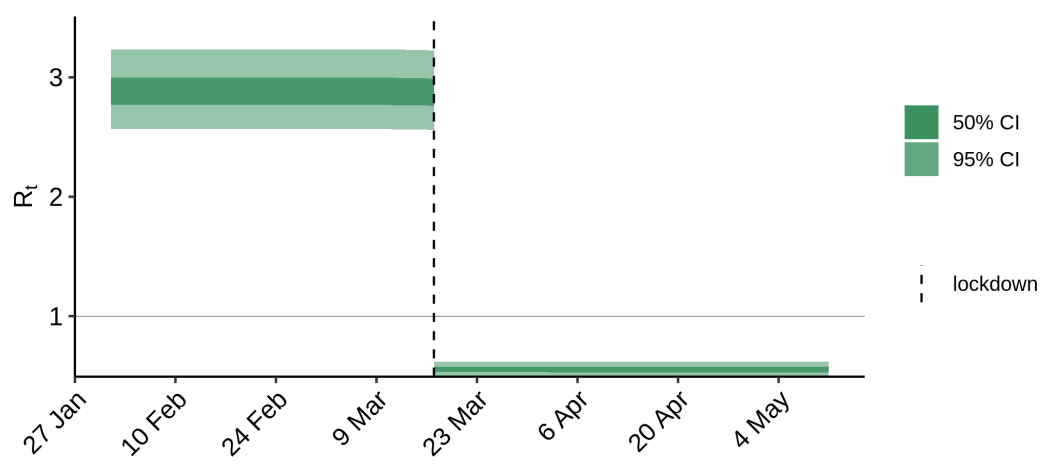

centre.val.de.loire

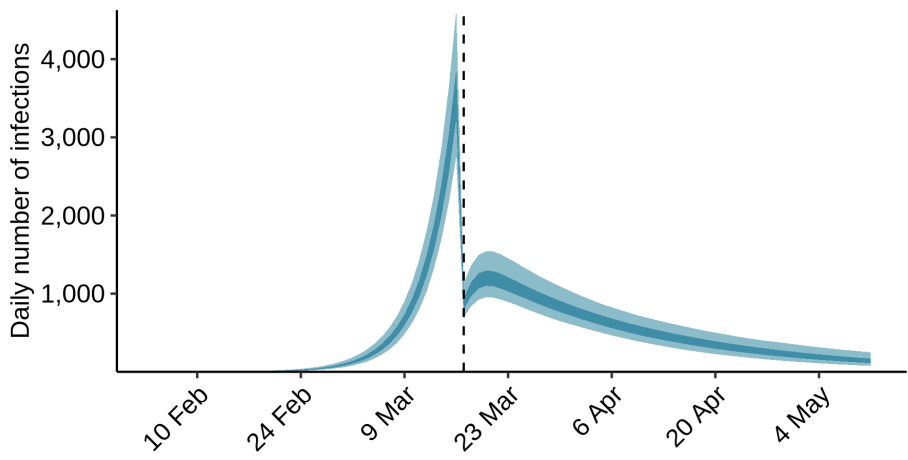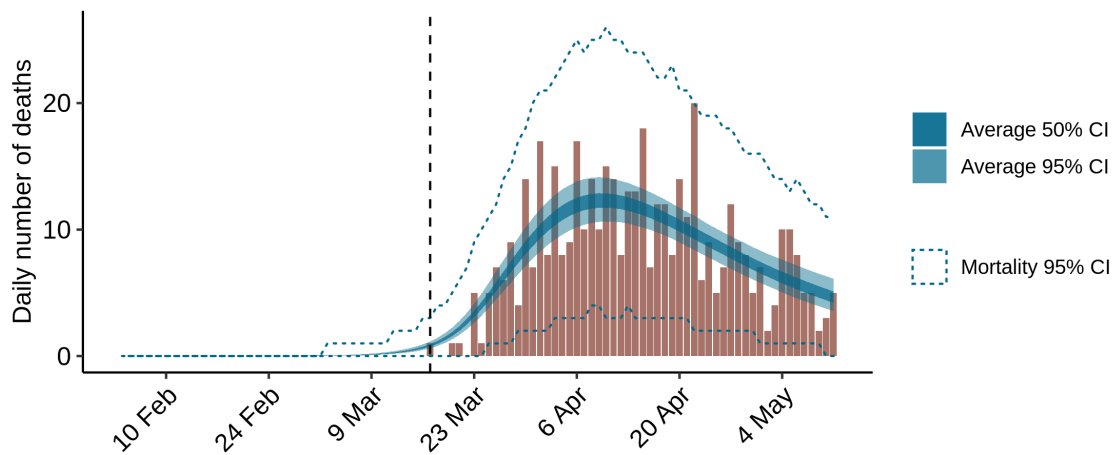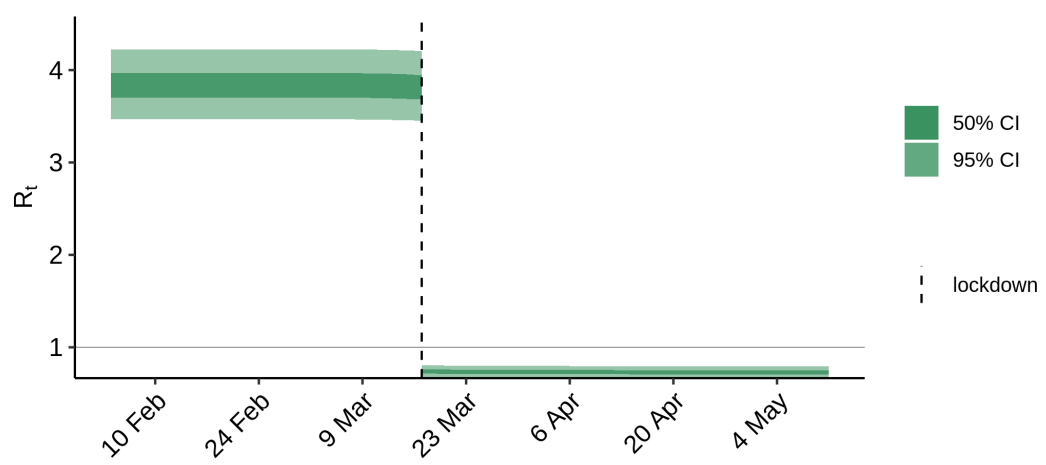

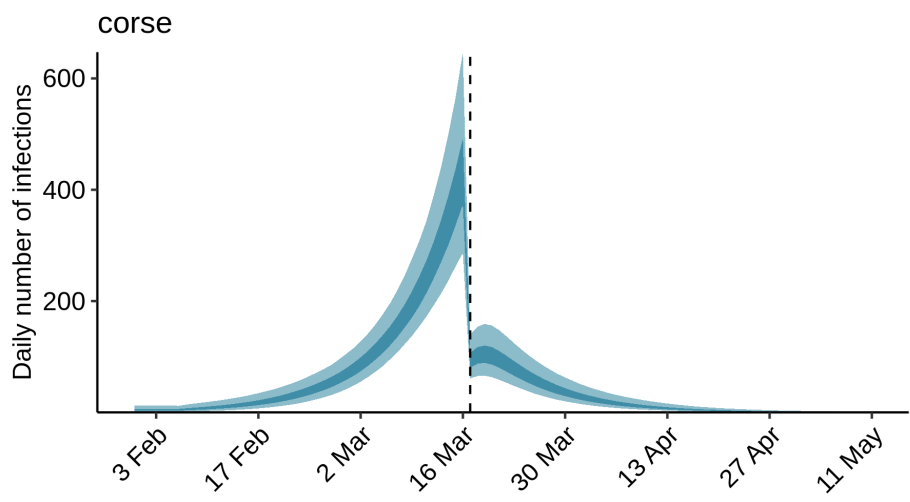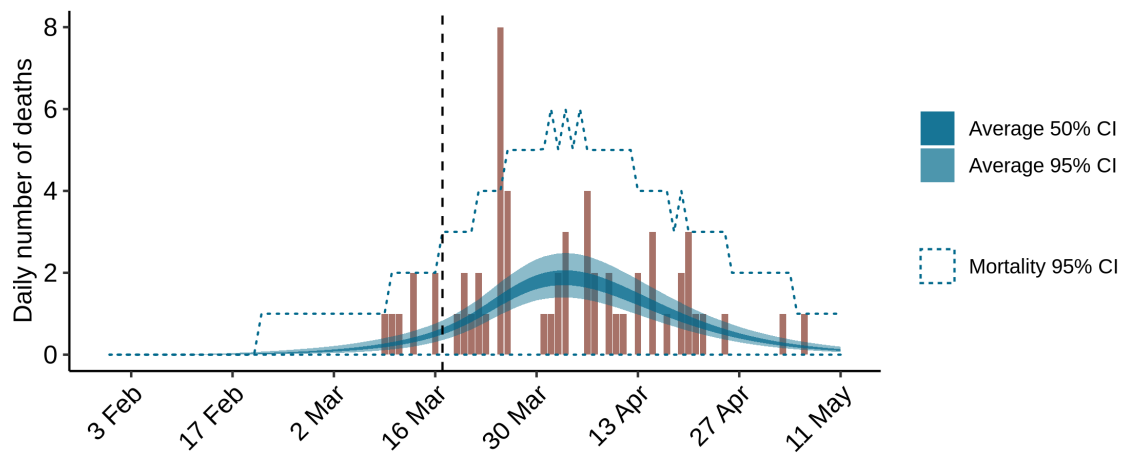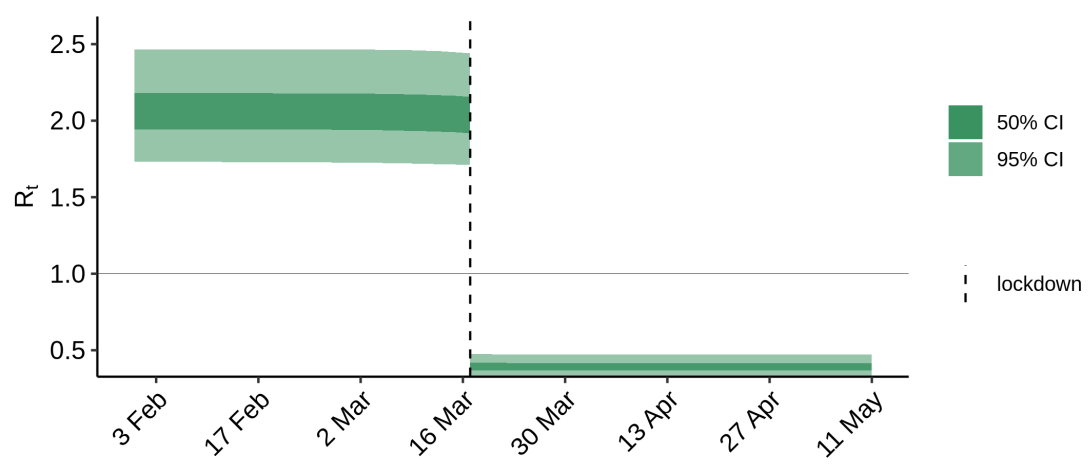

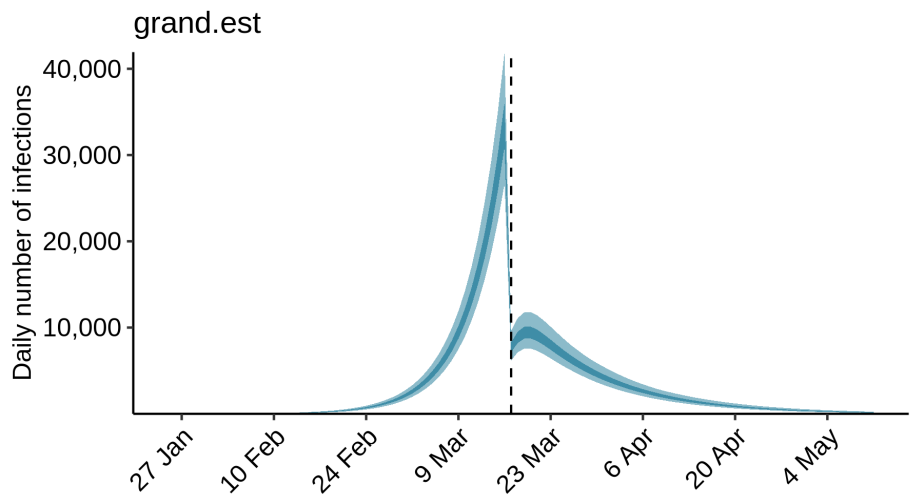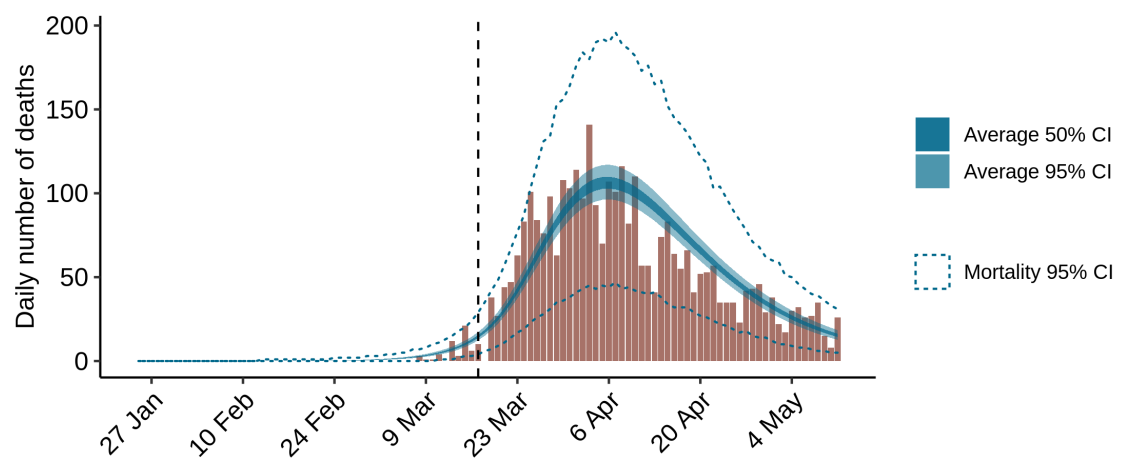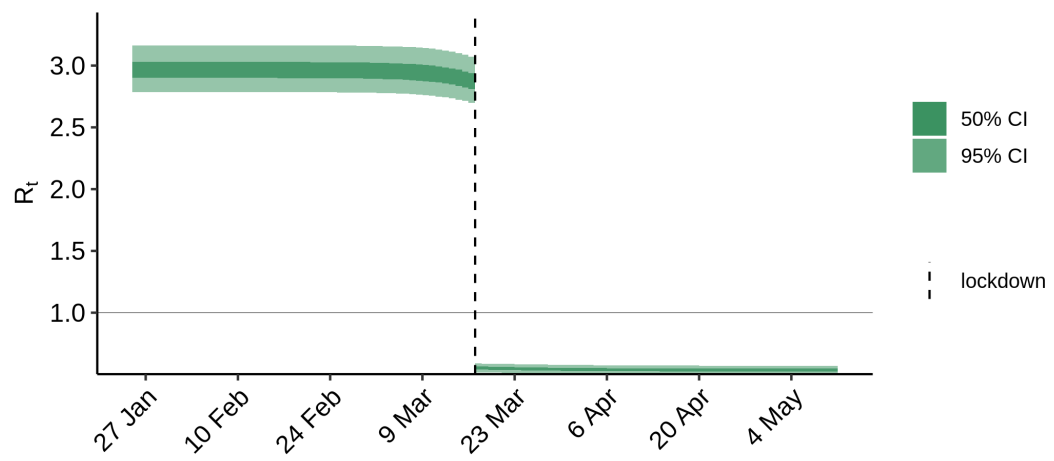

hauts.de.france

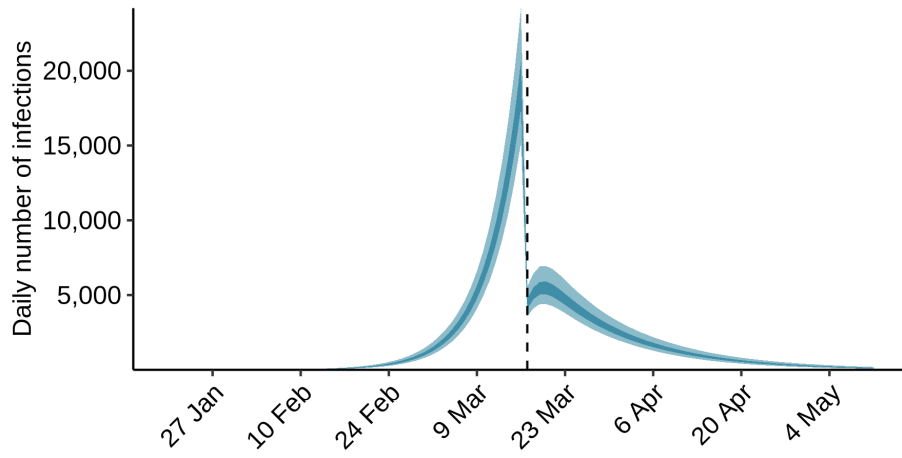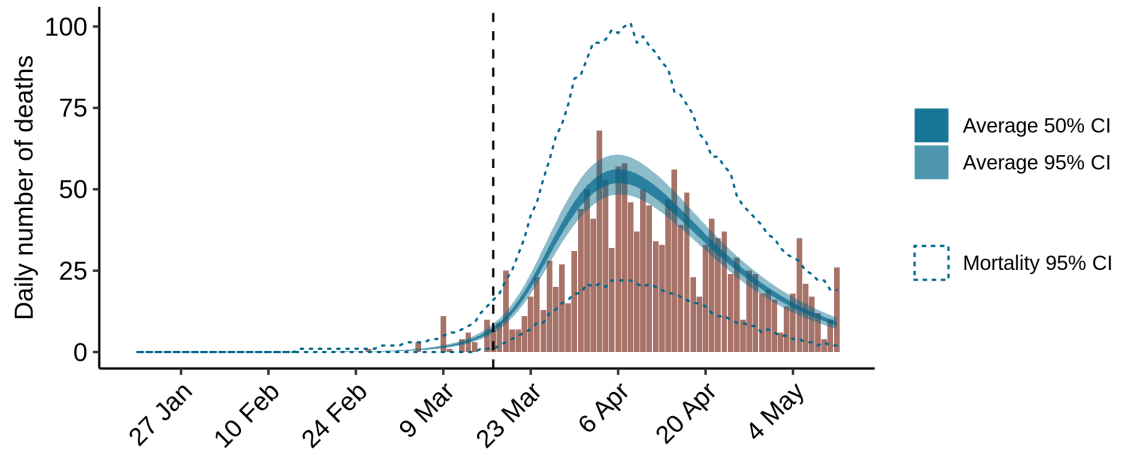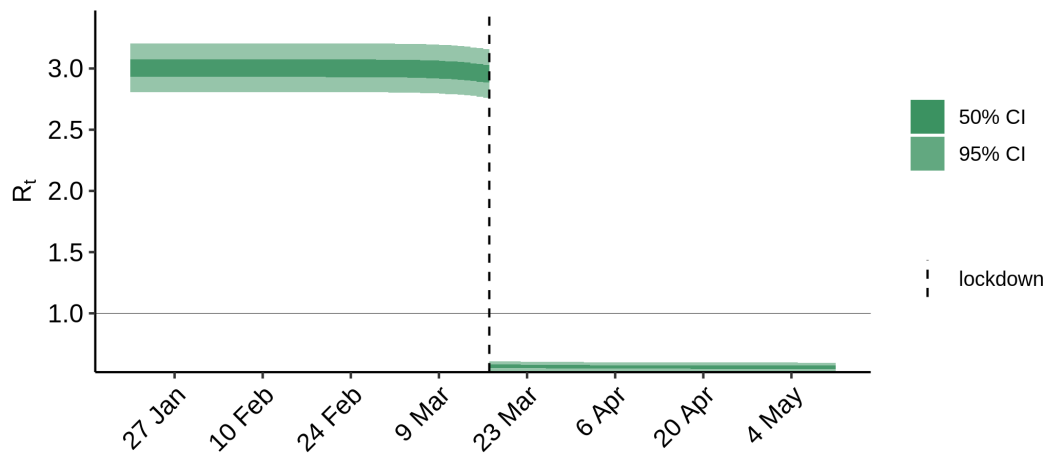



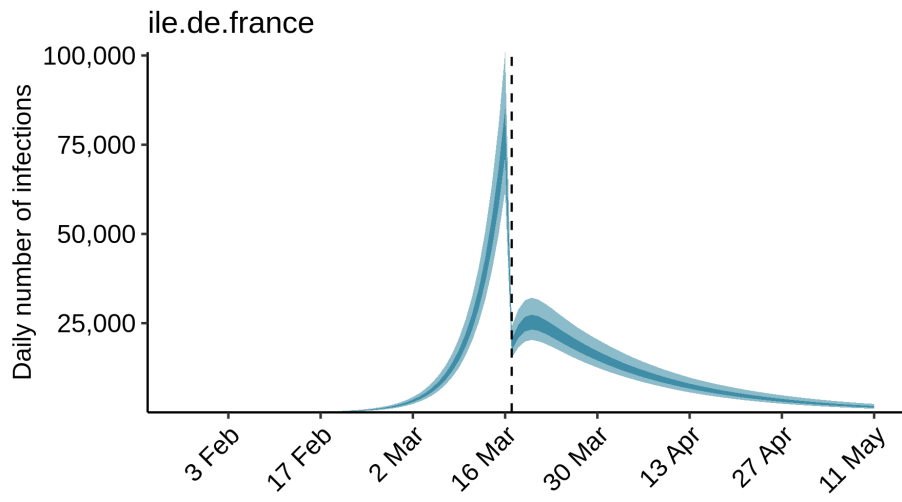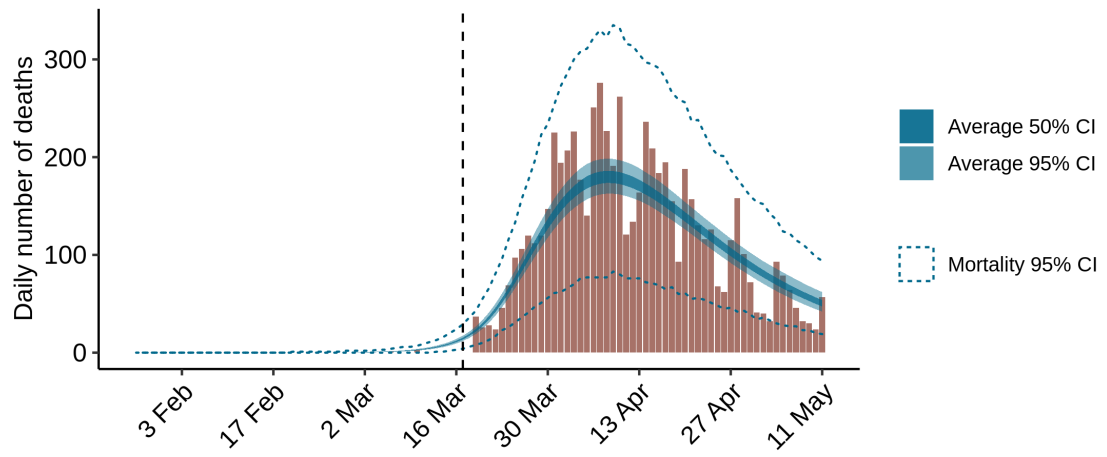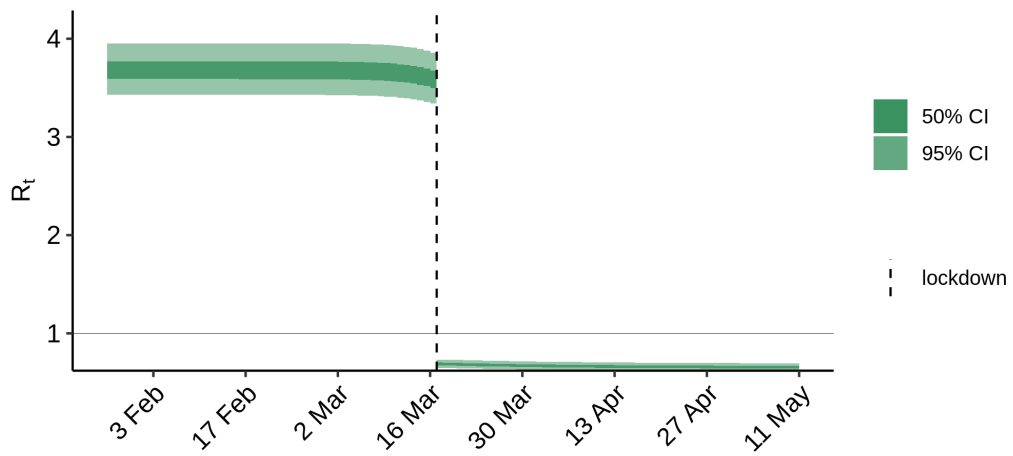

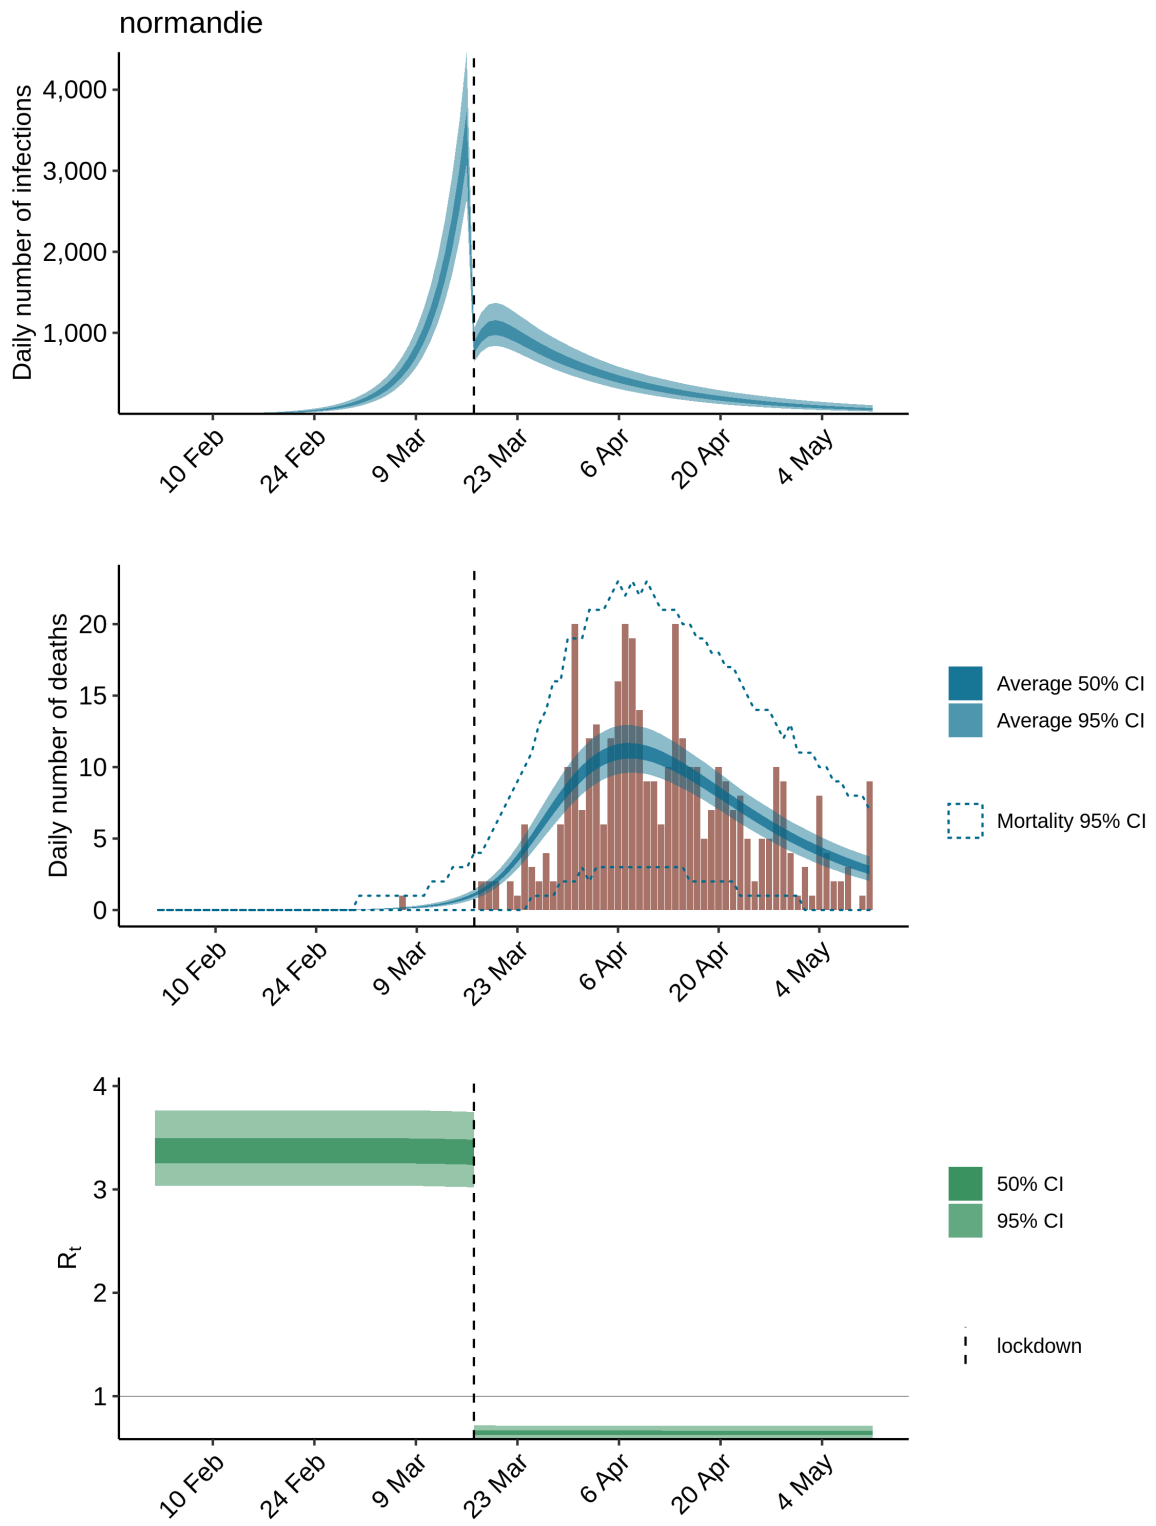

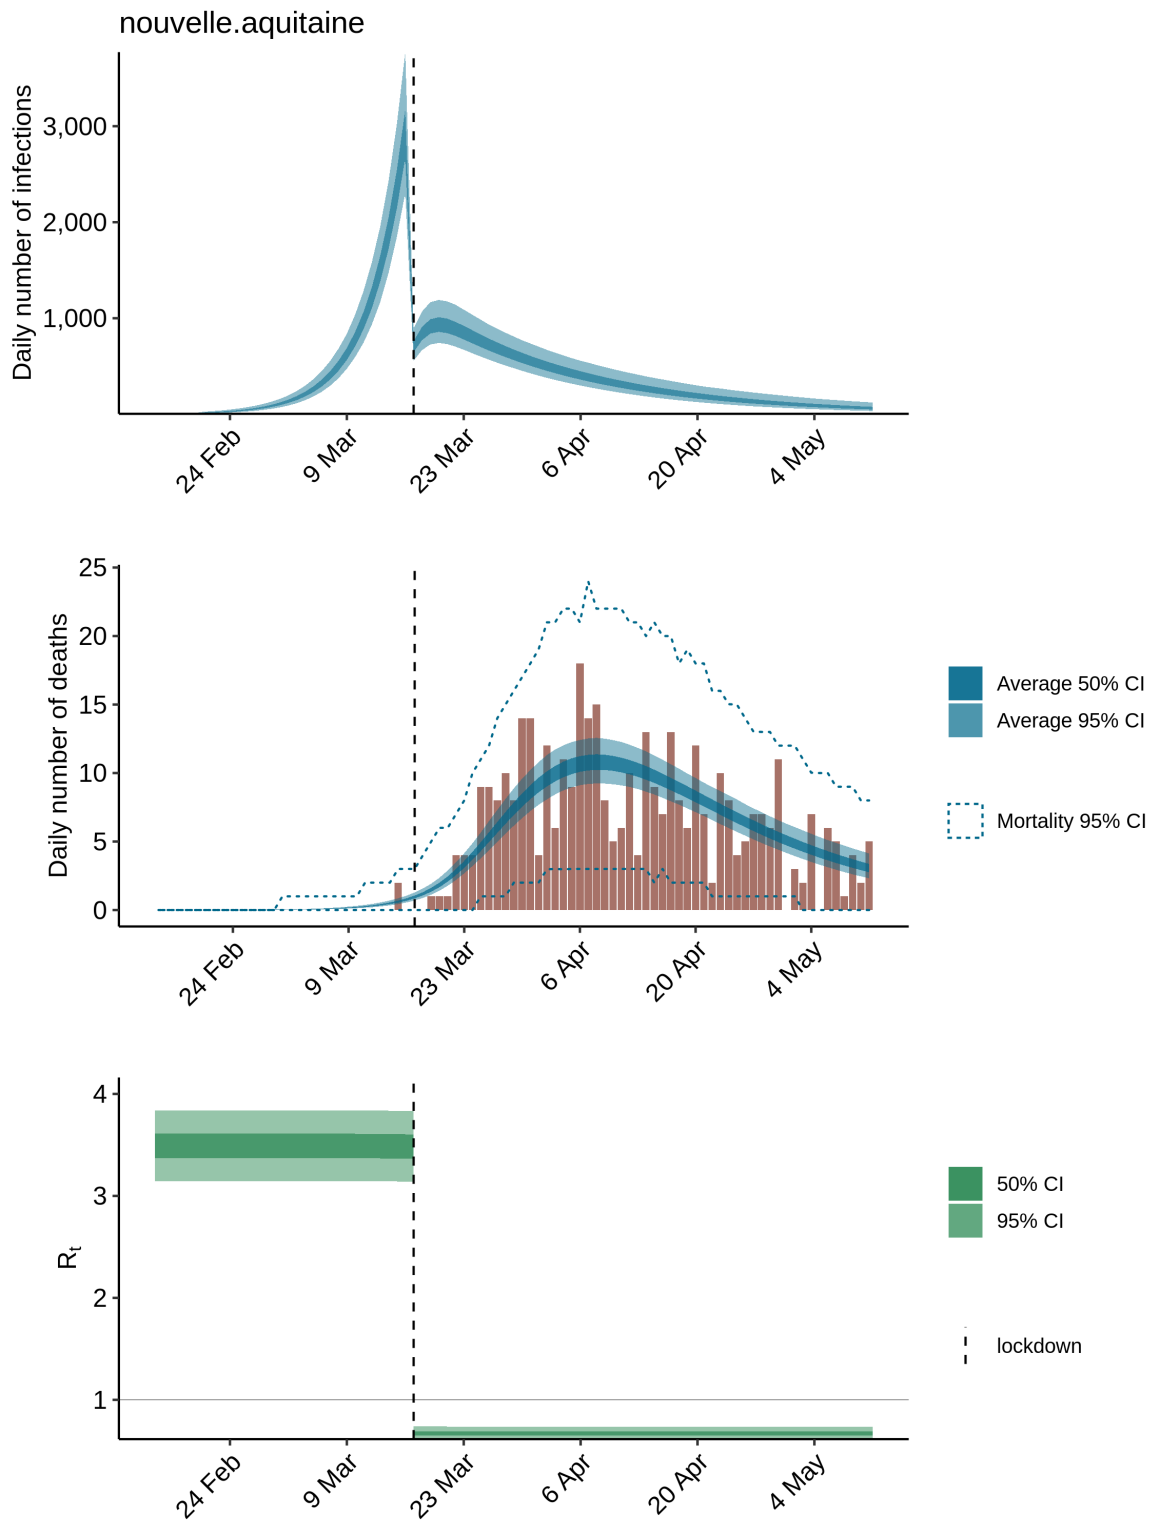

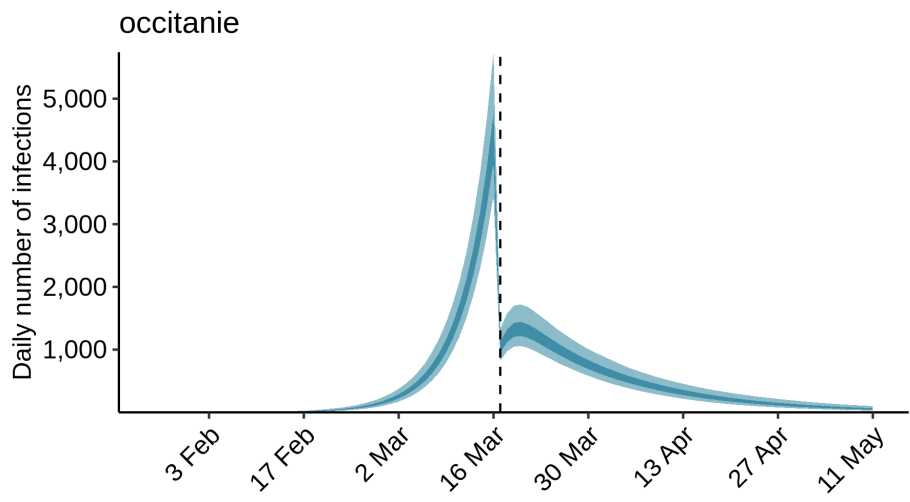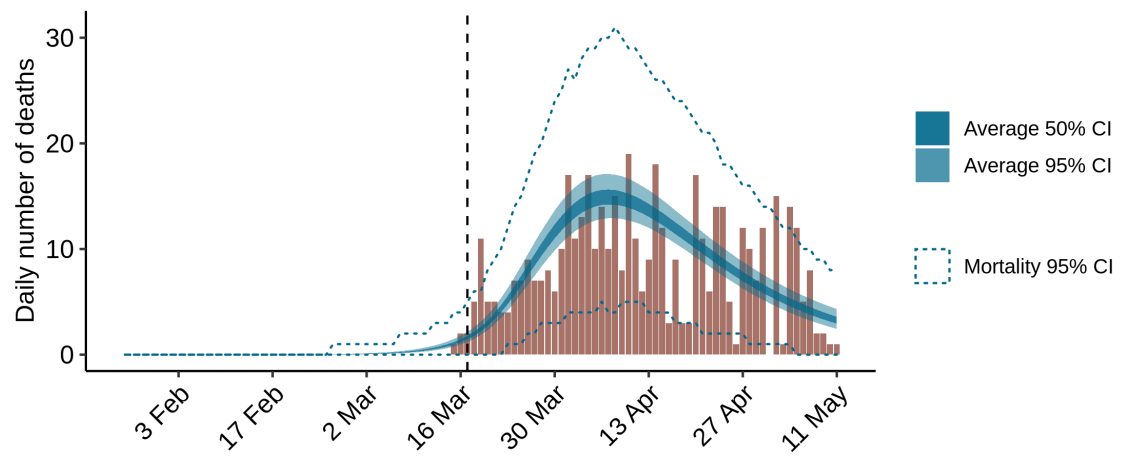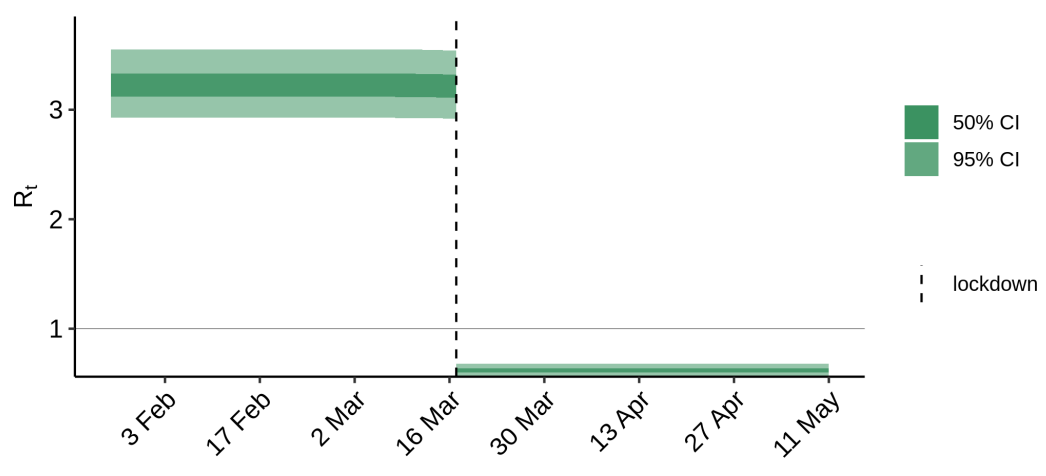

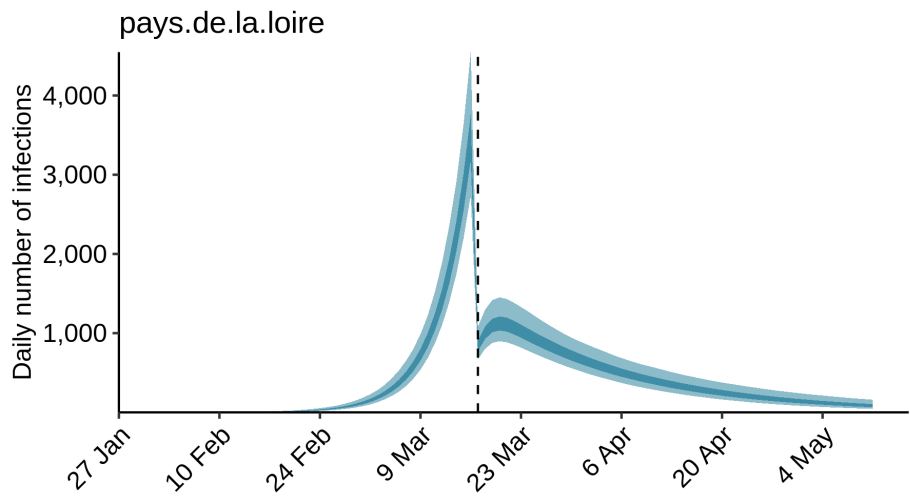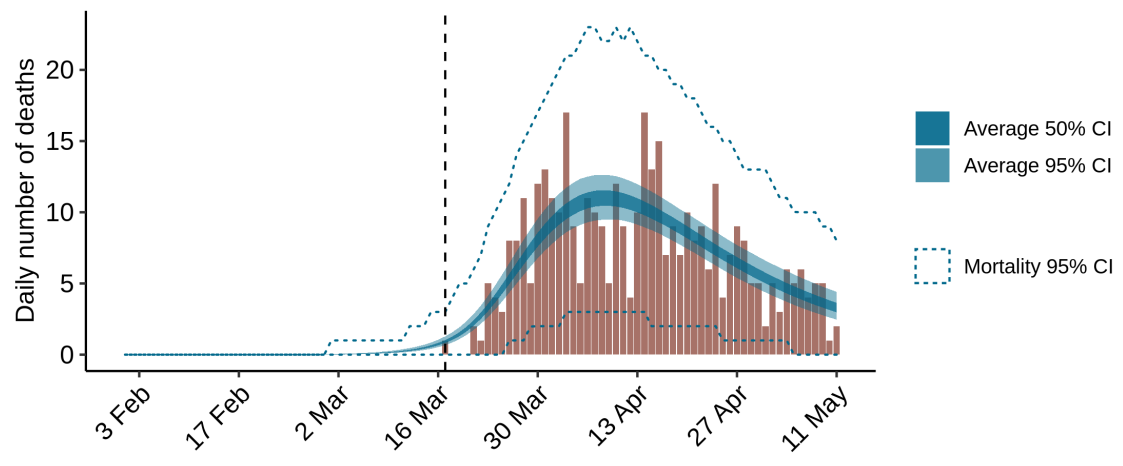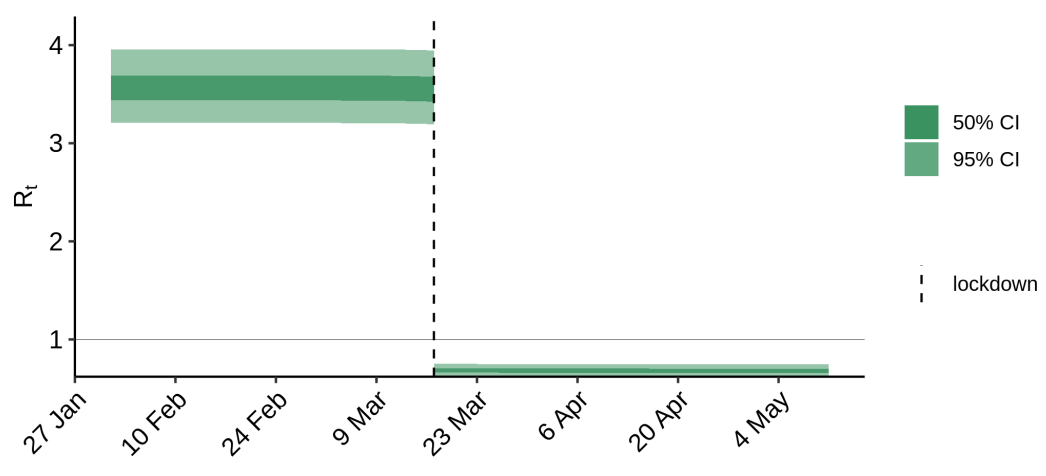

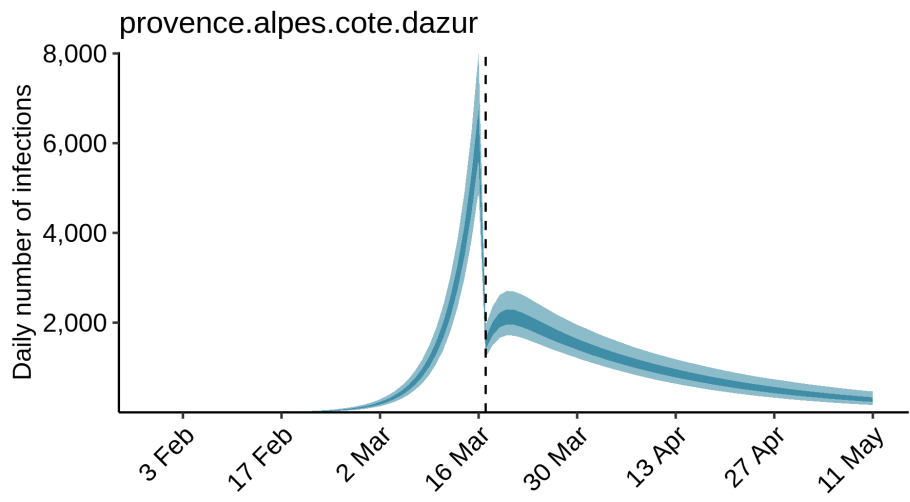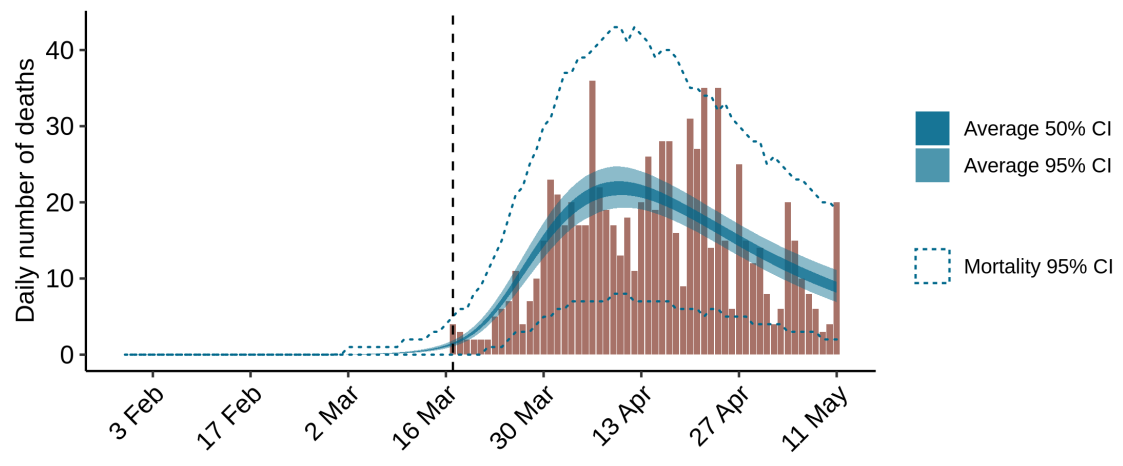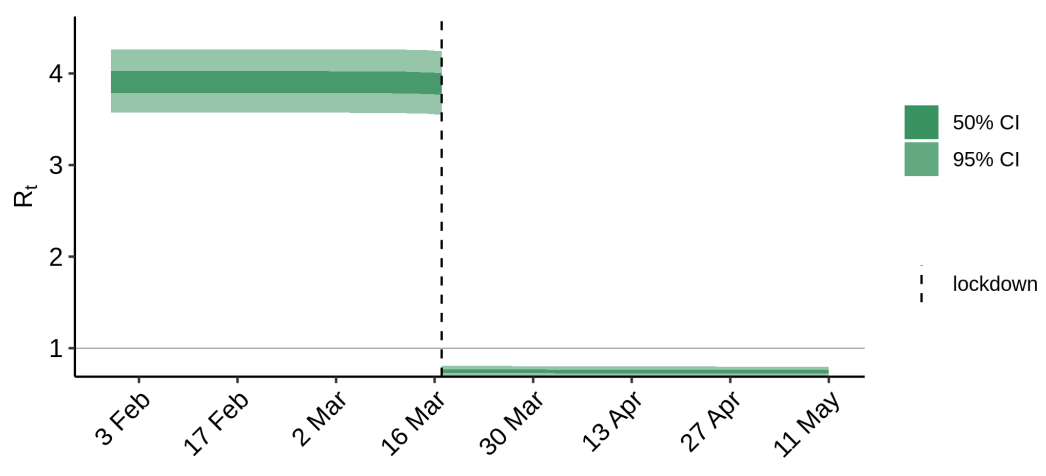

## 2 Region-wise simulations for week-ends effect size

auvergne-rhone-alpes

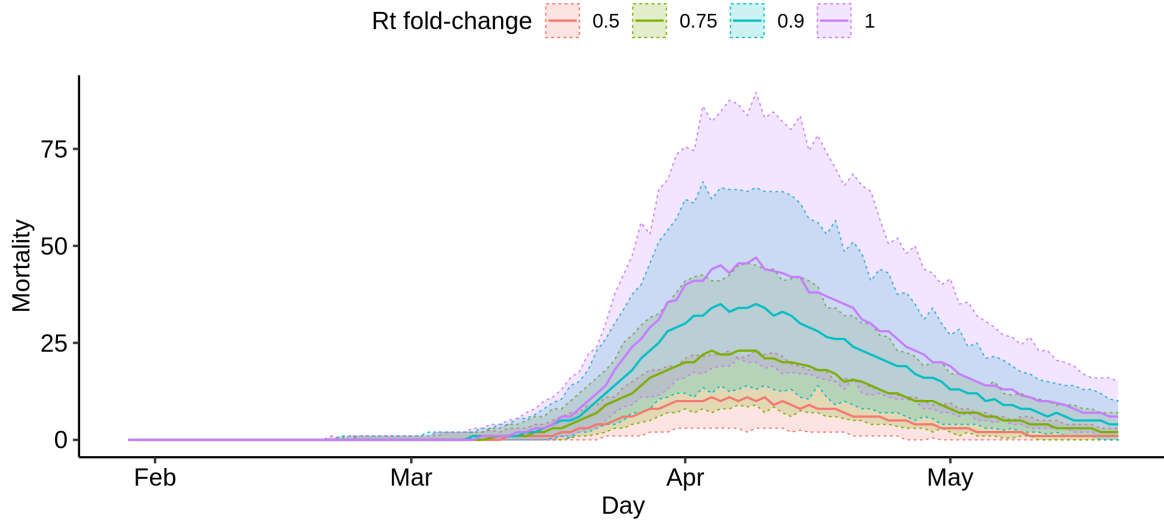

bourgogne-franche-comte

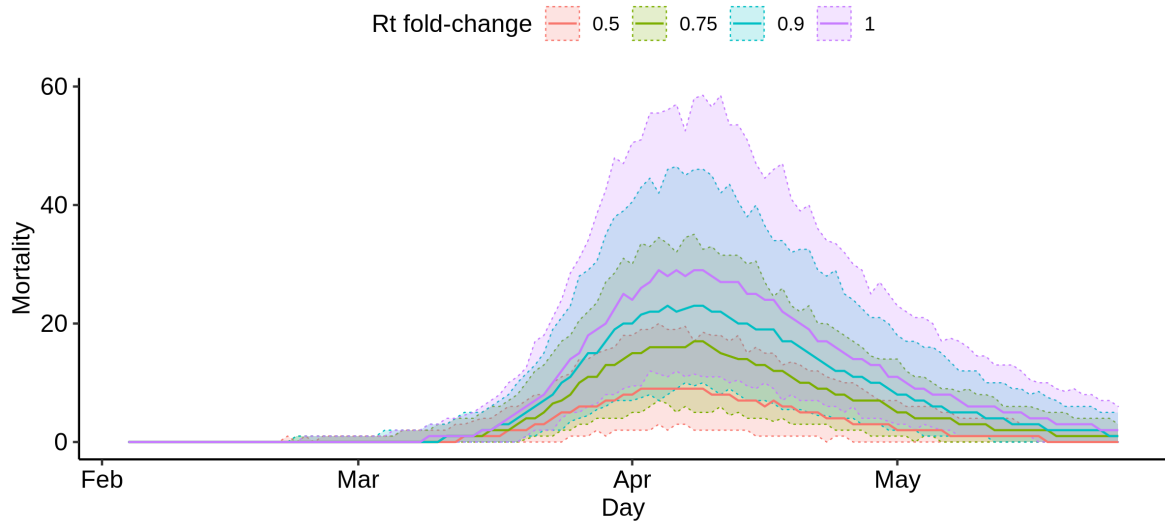

bretagne

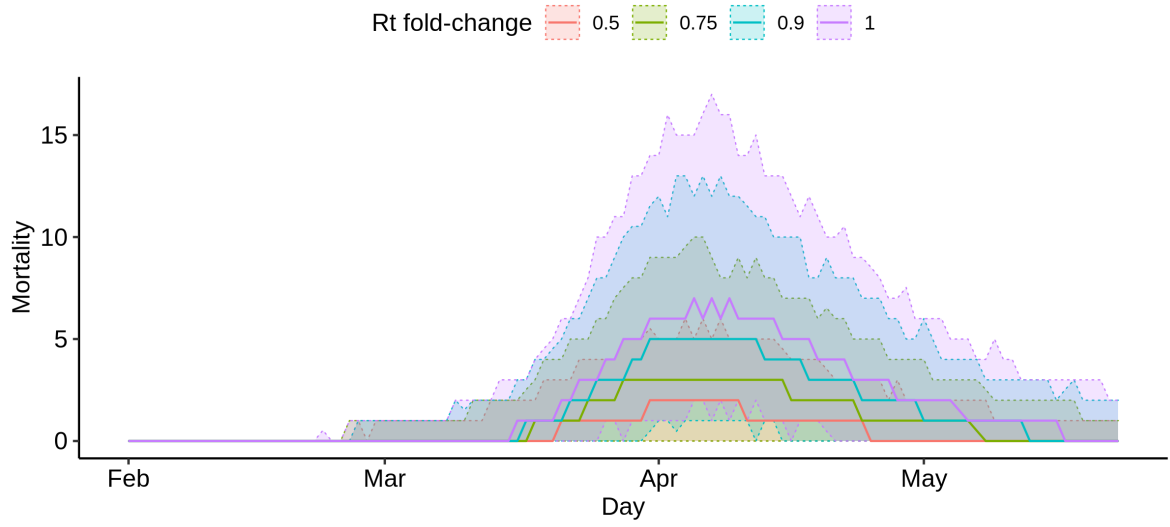

centre-val-de-loire

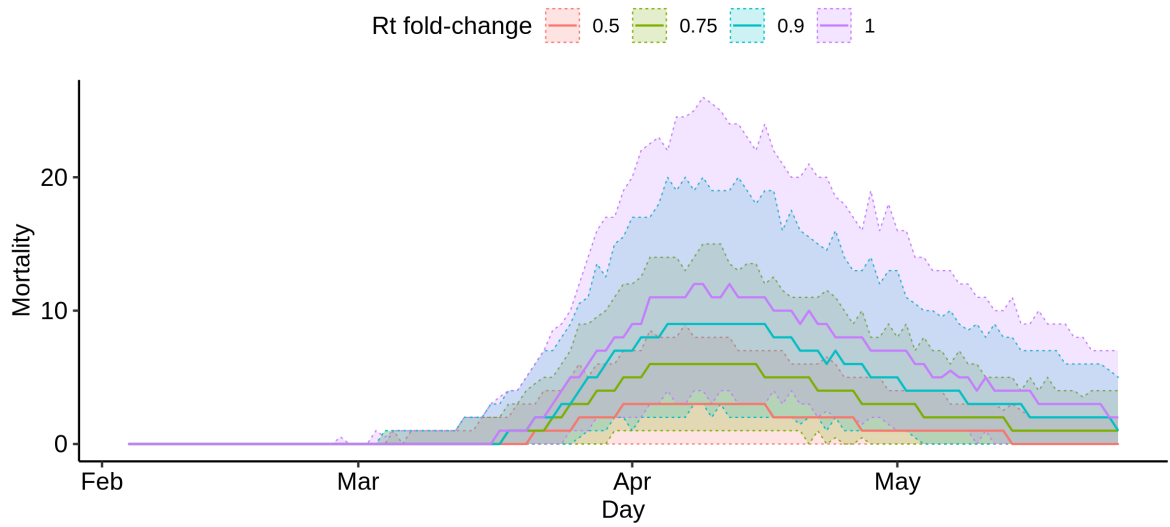



corse

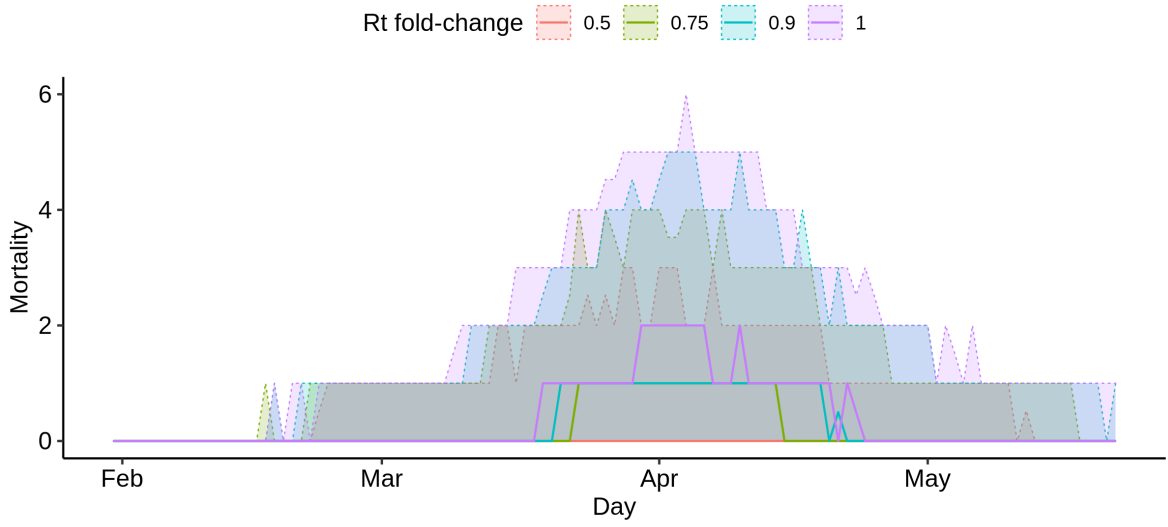

grand-est

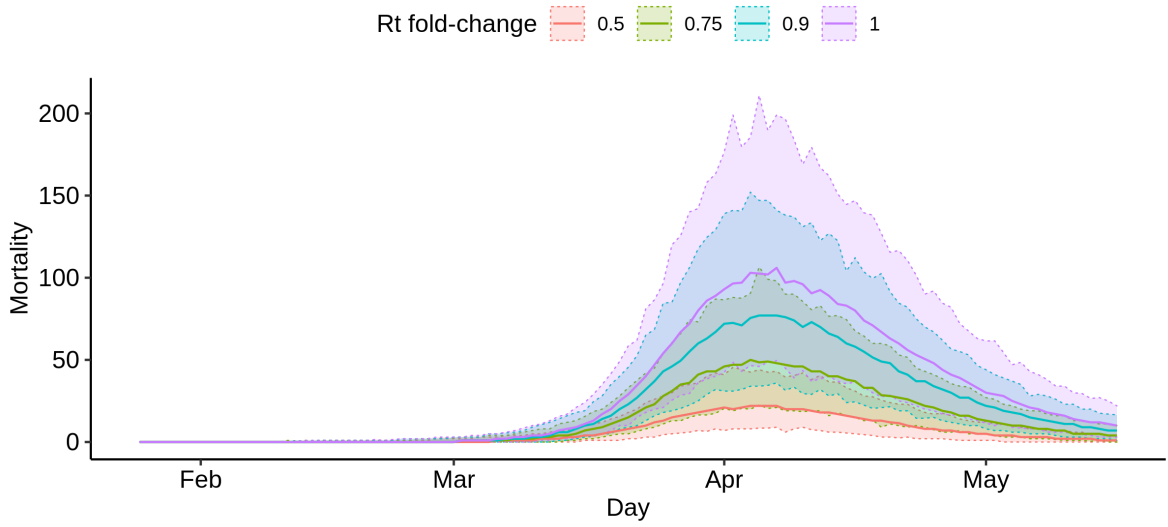

hauts-de-france

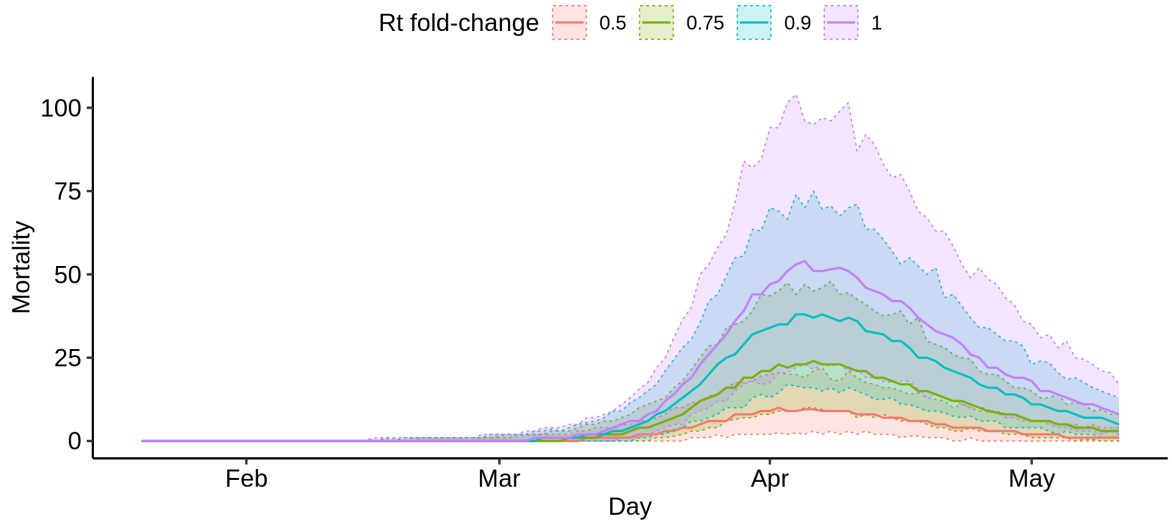

ile-de-france

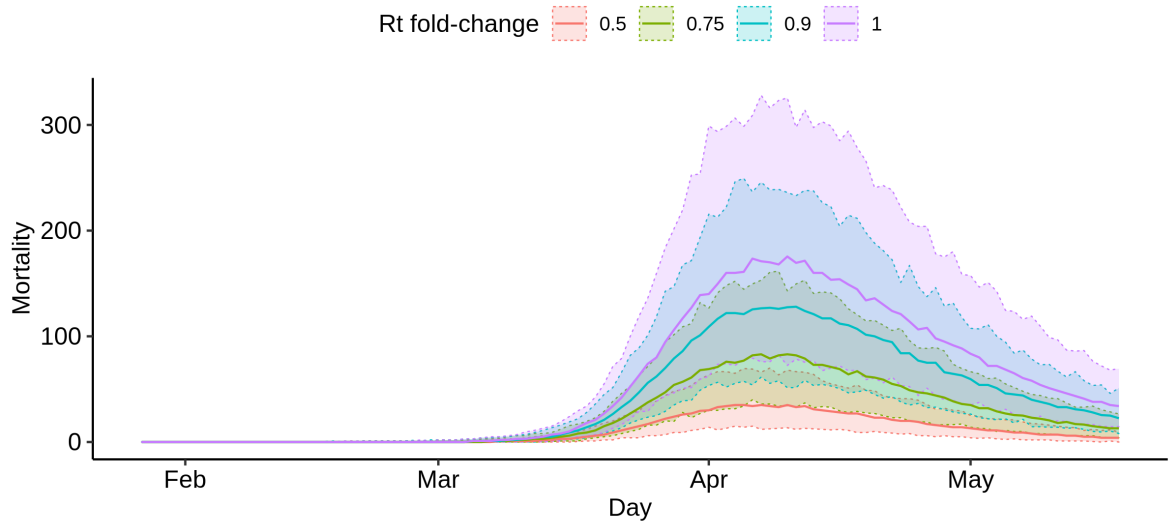

normandie

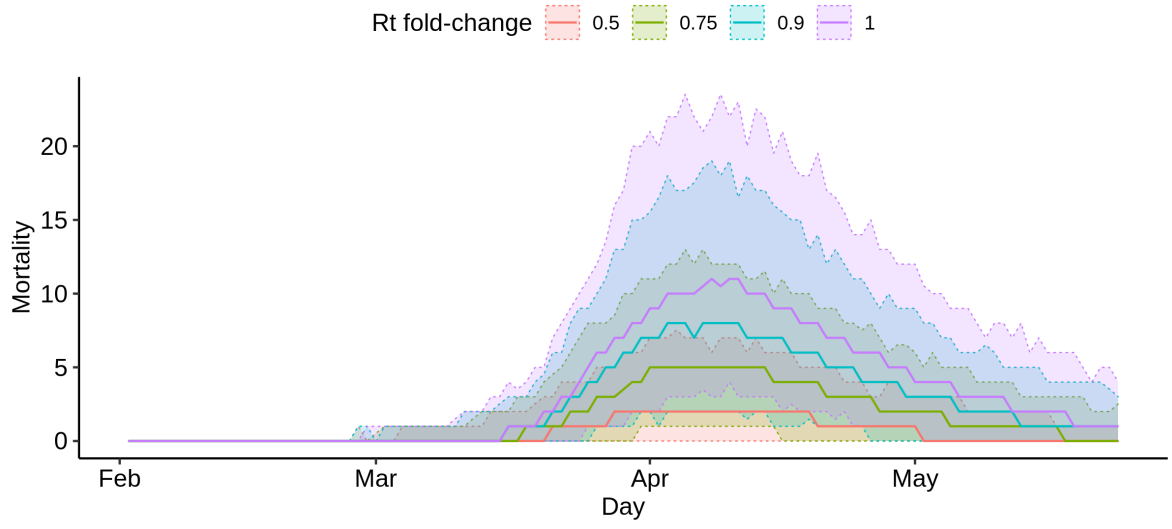

nouvelle-aquitaine

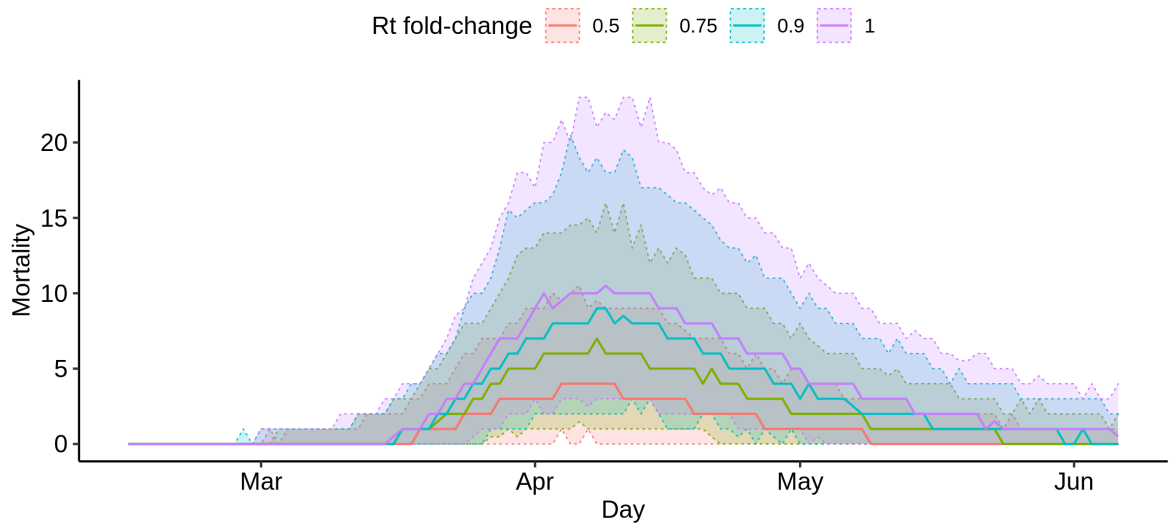

occitanie

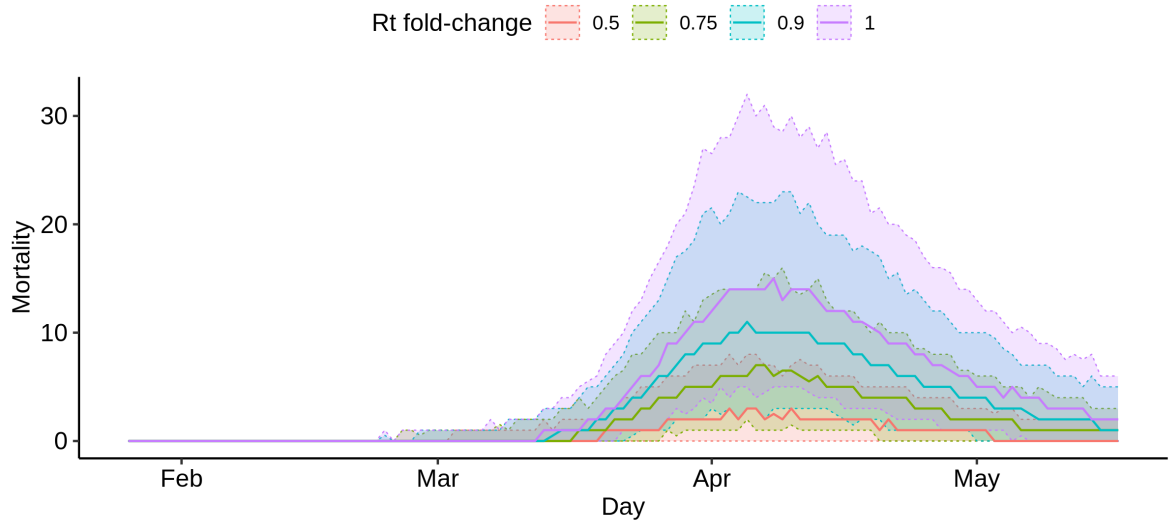

pays-de-la-loire

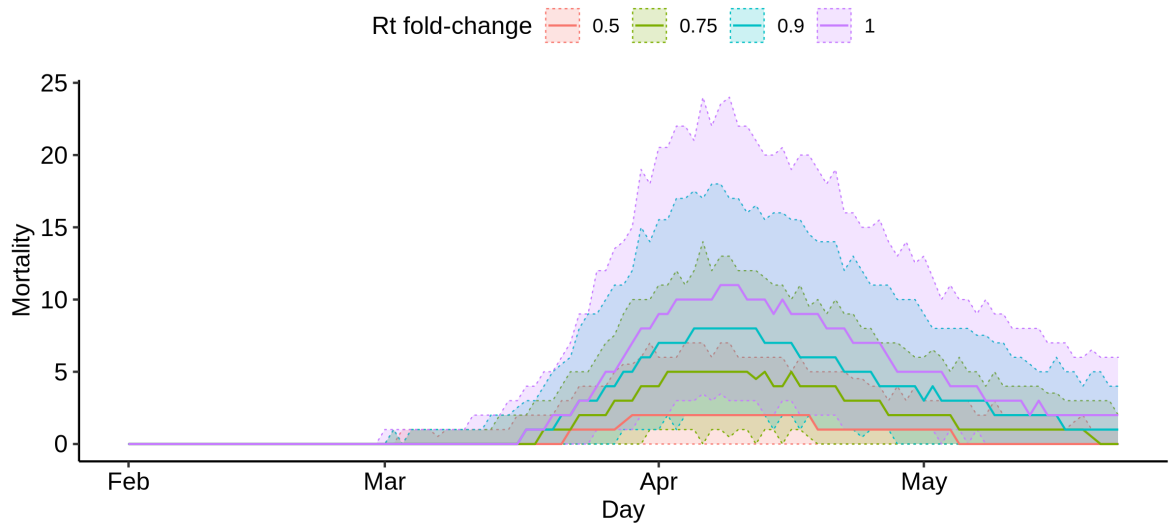

provence-alpes-cote-dazur

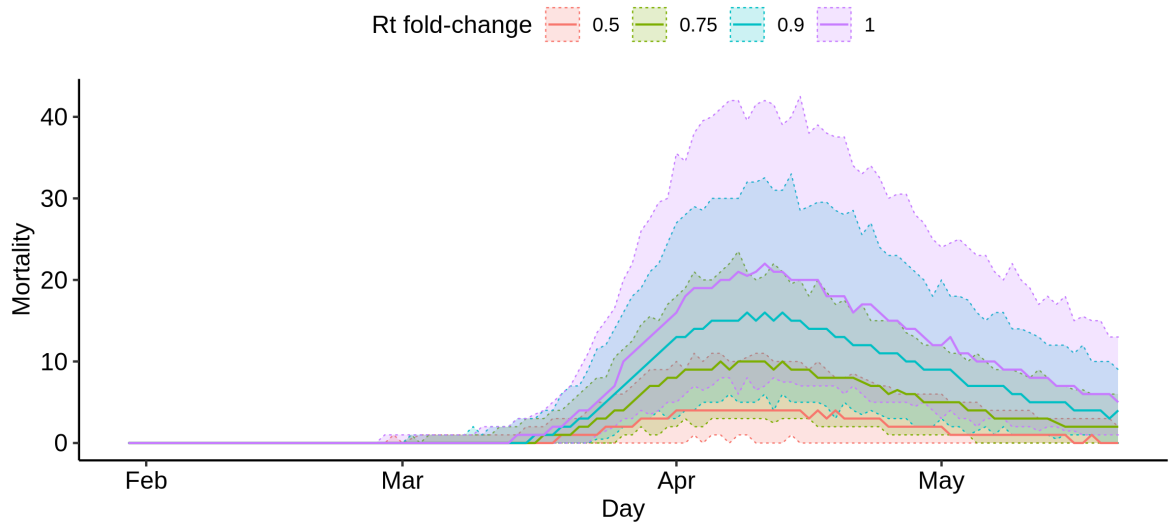

### 3 Region-wise simulations for elections effect size

auvergne-rhone-alpes

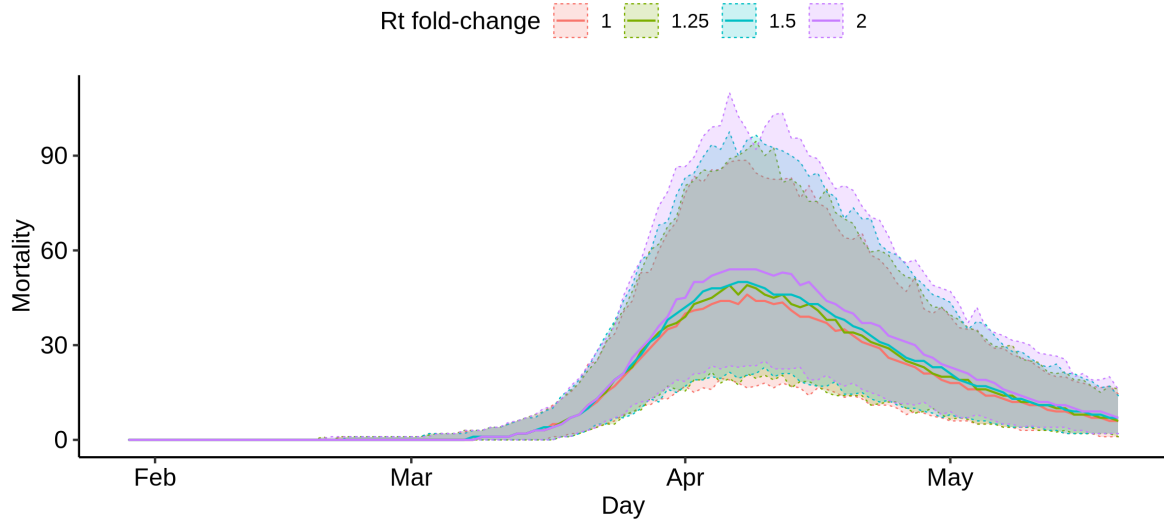

bourgogne-franche-comte

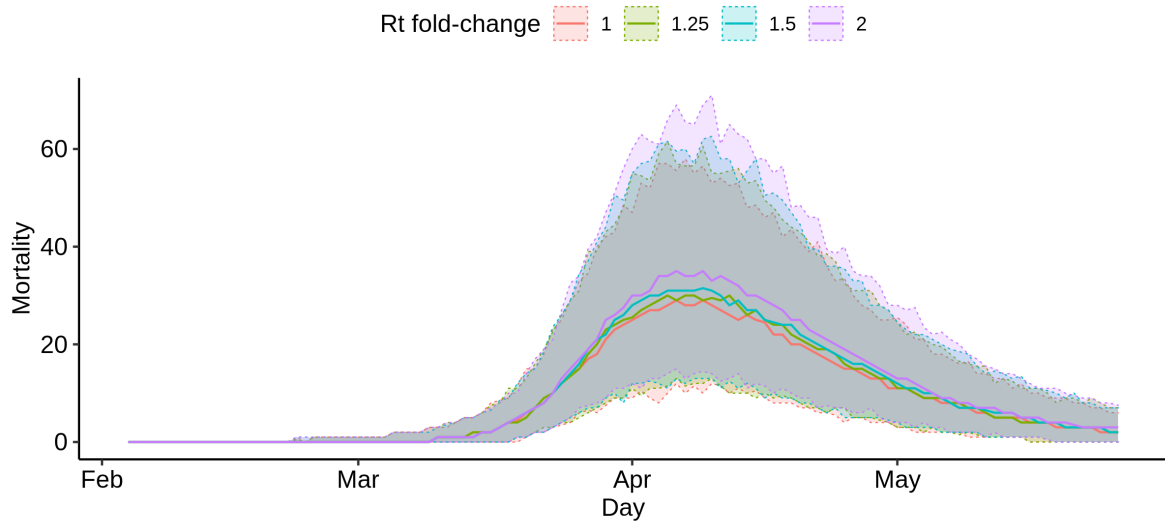

bretagne

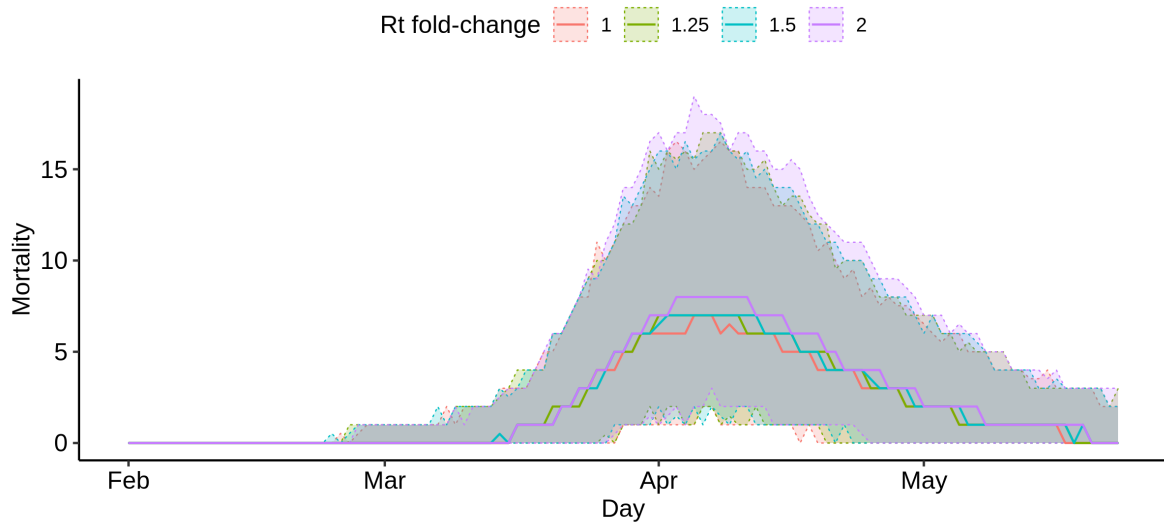

centre-val-de-loire

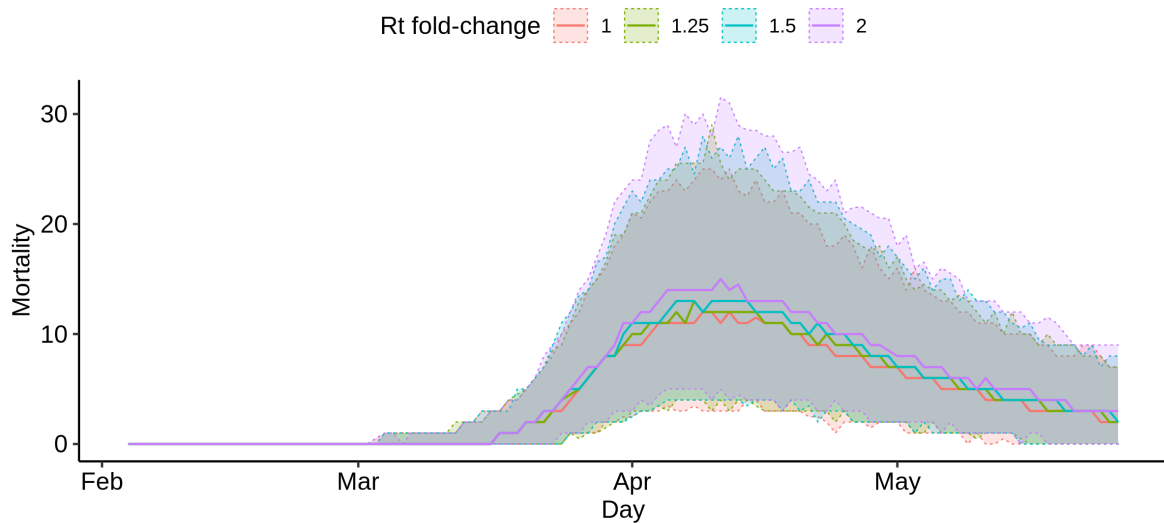

corse

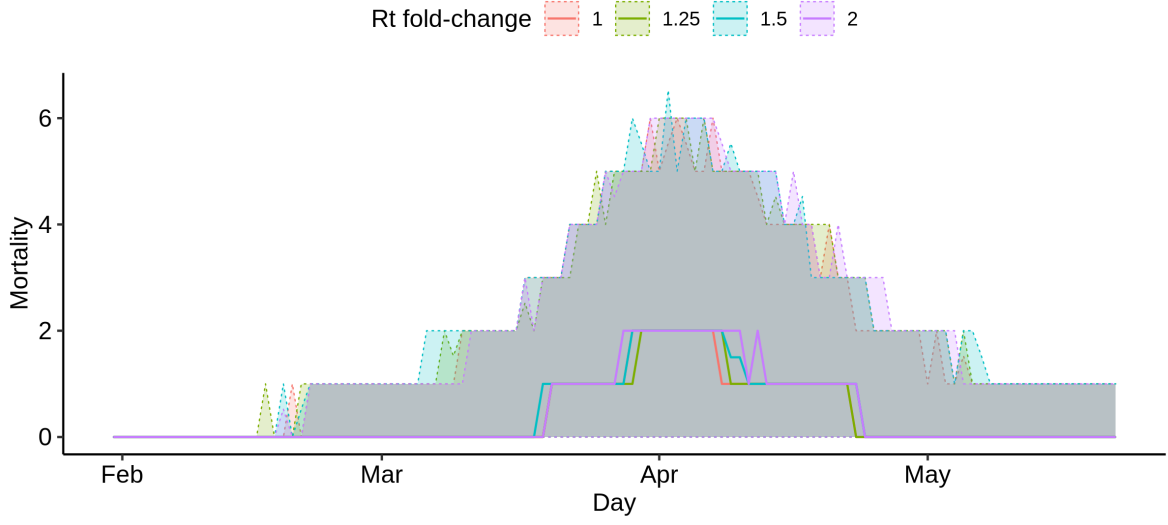

grand-est

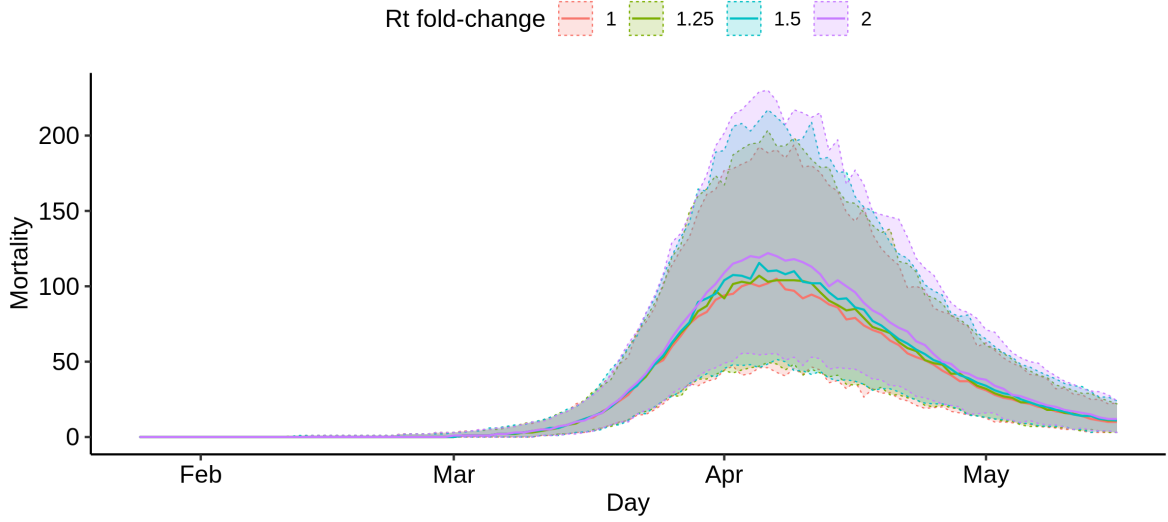



hauts-de-france

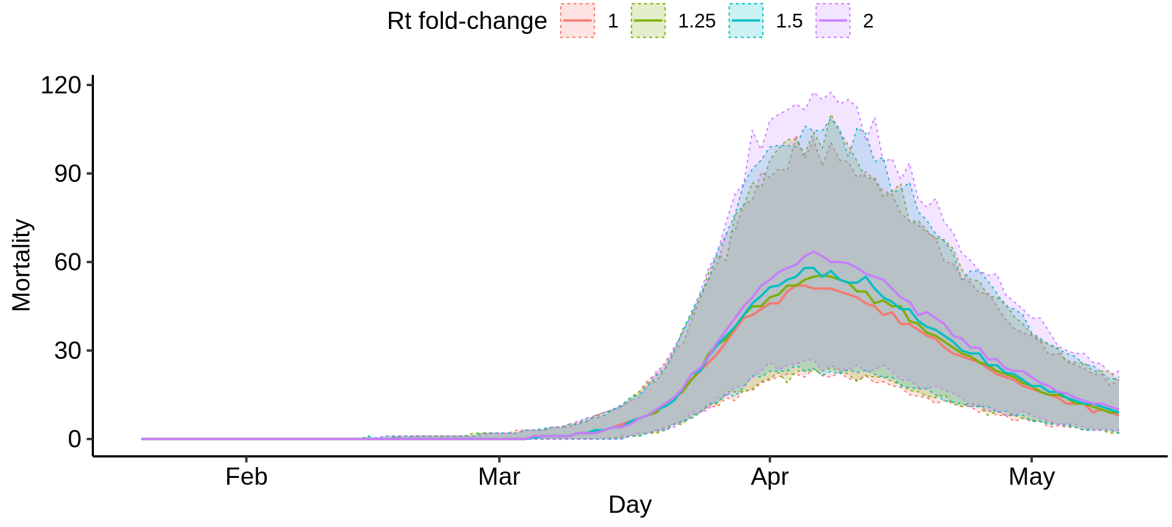

ile-de-france

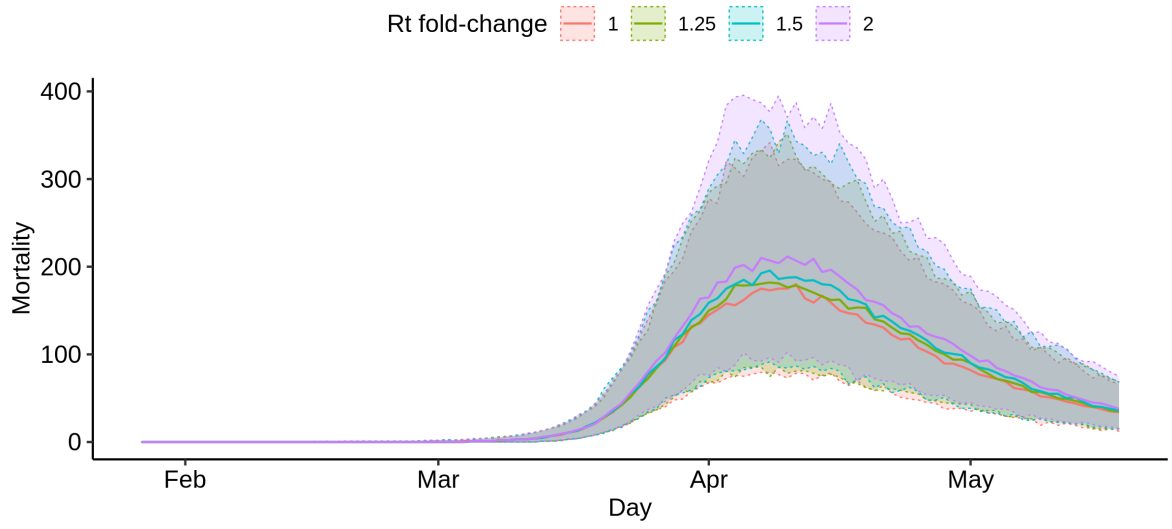

normandie

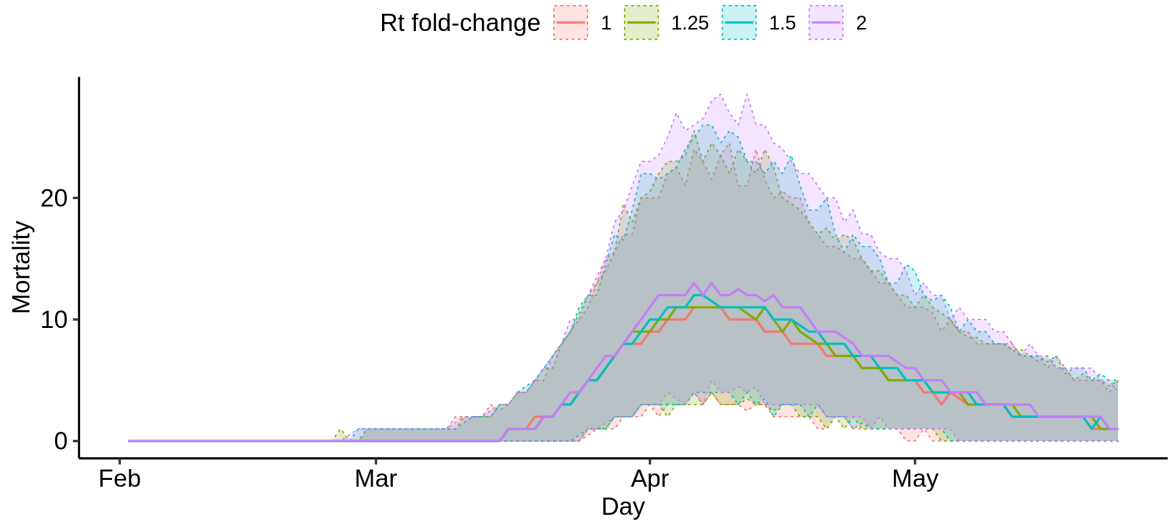

nouvelle-aquitaine

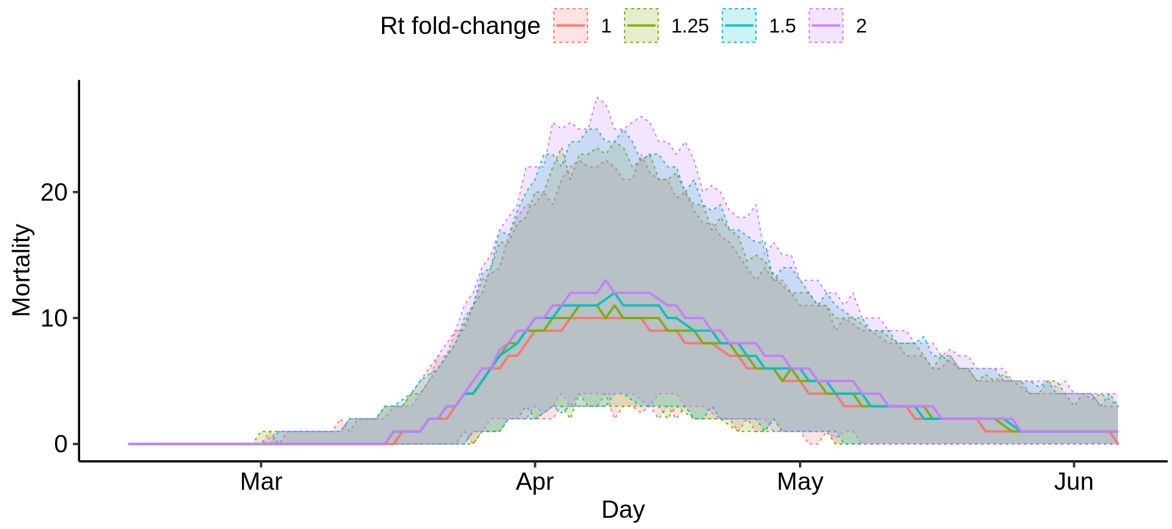

occitanie

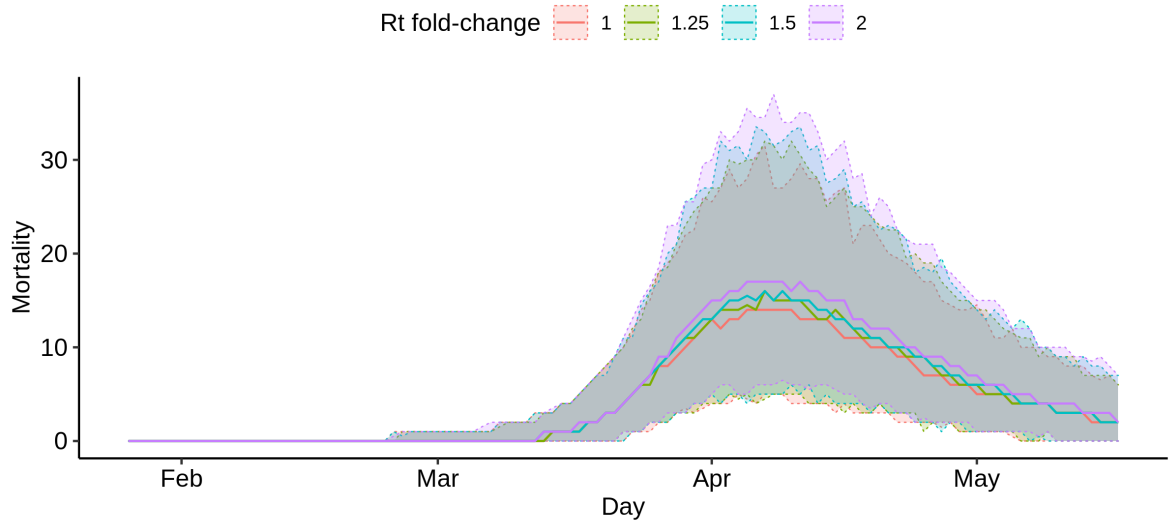

pays-de-la-loire

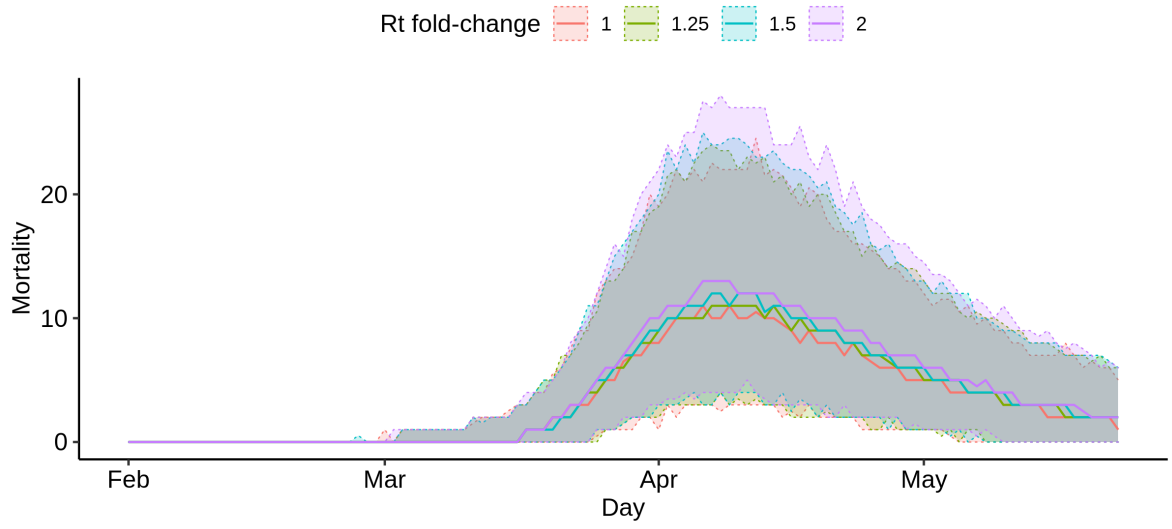

provence-alpes-cote-dazur

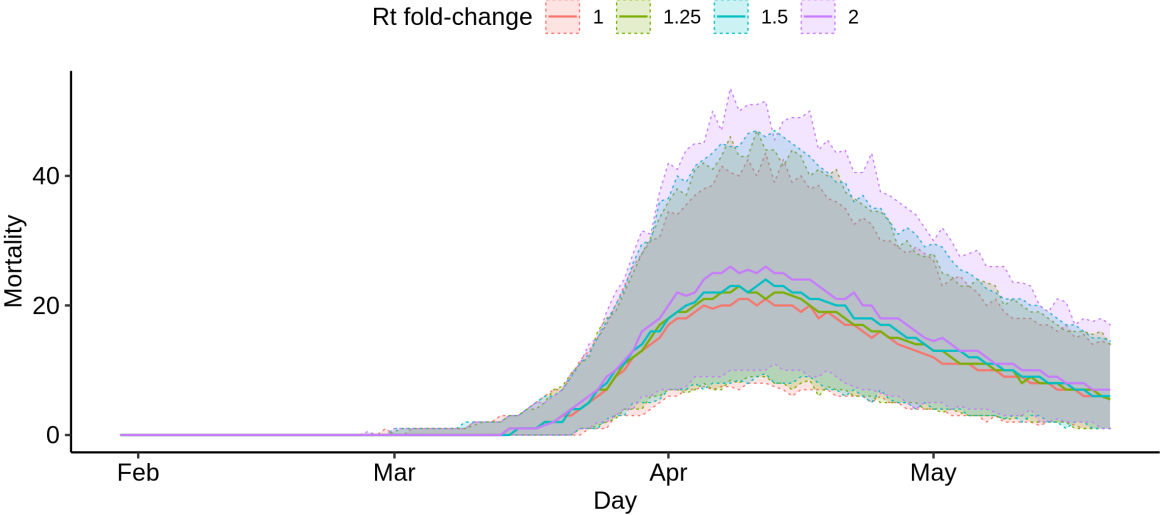

## References
